# Supplementary material for: 2-Benzylidenebenzofuran-3(2H)-ones as a new class of alkaline phosphatase inhibitors: synthesis, SAR analysis, enzyme inhibitory kinetics and computational studies
Source: Royal Society of Chemistry journal article supplement (doi:10.1039/d1ra07379f), 2021-01-01

## **Supplementary Information (SI-1) NMR Spectra**

### **2-Benzylidenebenzofuran-3(2H)-ones as a New Class of Alkaline Phosphatase Inhibitors: Synthesis, SAR Analysis, Enzyme Inhibitory Kinetics and Computational Studies**

Jamshaid Ashraf<sup>a</sup>, Ehsan Ullah Mughal<sup>\*a</sup>, Reem I. Alsantali<sup>b</sup>, Amina Sadiq<sup>c</sup>, Rabab. S. Jassas<sup>d</sup>, Nafeesa Naeem<sup>a</sup>, Zaman Ashraf<sup>\*e</sup>, Yasir Nazir<sup>e,f</sup>, Muhammad Naveed Zafar<sup>g</sup>, Amara Mumtaz<sup>h</sup>, Masoud Mirzaei<sup>i</sup>, Satar Saberi<sup>j</sup>, Saleh A. Ahmed<sup>\*k,l</sup>

<sup>a</sup>*Department of Chemistry, University of Gujrat, Gujrat-50700, Pakistan*

<sup>b</sup>*Department of Pharmaceutical Chemistry, College of Pharmacy, Taif University, P.O.Box 11099, Taif 21944, Saudi Arabia*

<sup>c</sup>*Department of Chemistry, Govt. College Women University, Sialkot-51300, Pakistan*

<sup>d</sup>*Department of Chemistry, Jamoum University College, Umm Al-Qura University, 21955 Makkah, Saudi Arabia*

<sup>e</sup>*Department of Chemistry, Allama Iqbal Open University, Islamabad-44000 Pakistan*

<sup>f</sup>*Department of Chemistry, University of Sialkot, Sialkot-51300, Pakistan*

<sup>g</sup>*Department of Chemistry, Quaid-i-Azam University, Islamabad-45320, Pakistan*

<sup>h</sup>*Department of Chemistry, COMSATS University Islamabad, Abbottabad, Pakistan*

<sup>i</sup>*Department of Chemistry, Faculty of Science, Ferdowsi University of Mashhad, Mashhad, 9177948974, Iran*

<sup>j</sup>*Department of Chemistry, Faculty of Science, Farhangian University, Tehran, Iran*

<sup>k</sup>*Department of Chemistry, Faculty of Applied Science, Umm Al-Qura University, 21955 Makkah Saudi Arabia*

<sup>l</sup>*Chemistry Department, Faculty of Science, Assiut University, 71516 Assiut, Egypt*

## **NMR Spectra of all the Newly Synthesized Compounds**

---

\* Correspondence may be addressed to: Ehsan Ullah Mughal; E-mail address: [ehsan.ullah@uog.edu.pk](mailto:ehsan.ullah@uog.edu.pk), Zaman Ashraf; E-mail address: [mzchem@yahoo.com](mailto:mzchem@yahoo.com), Saleh A. Ahmed; Email address: [saahmed@uqu.edu.sa](mailto:saahmed@uqu.edu.sa)

# <sup>1</sup>H-NMR (300 MHz, CDCl<sub>3</sub>) Spectrum of Compound 2

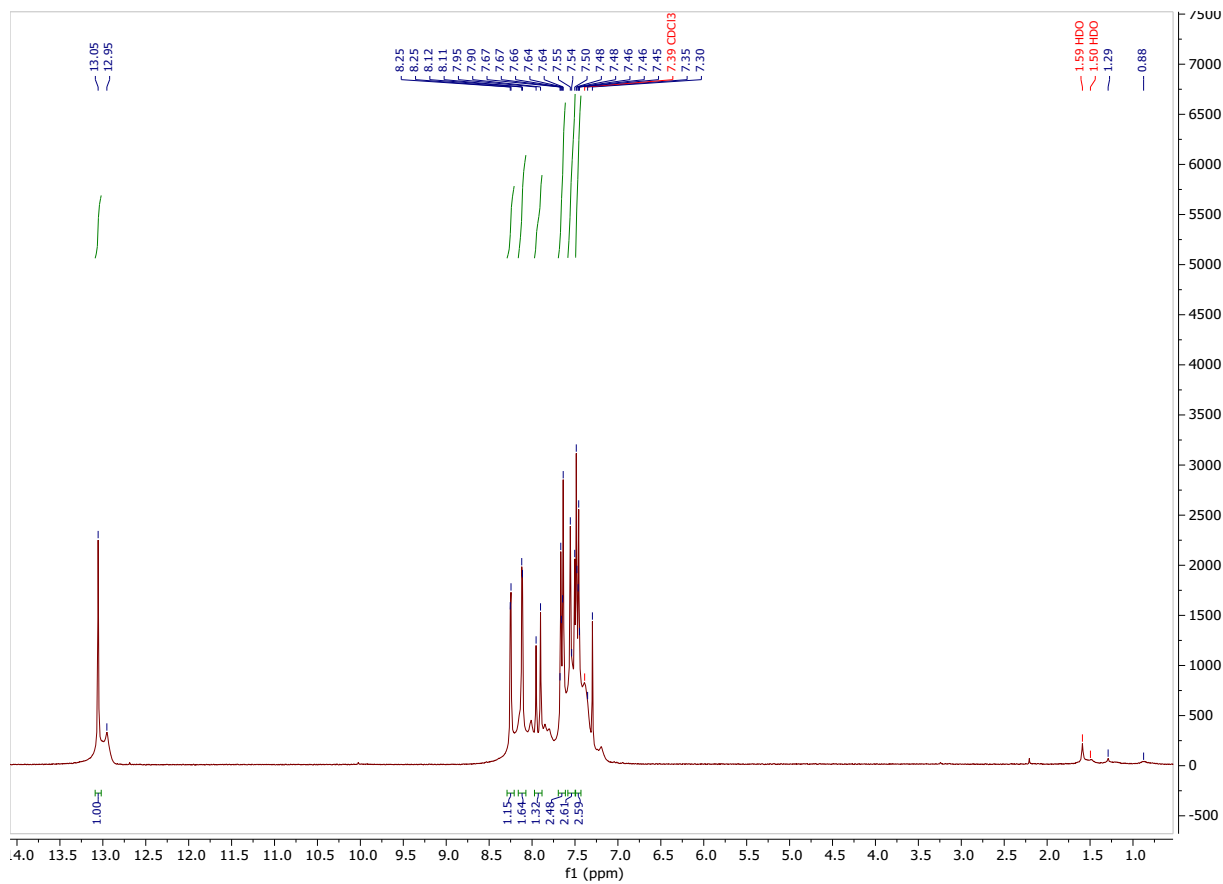

# <sup>13</sup>C-NMR (75 MHz, CDCl<sub>3</sub>) Spectrum of Compound 2

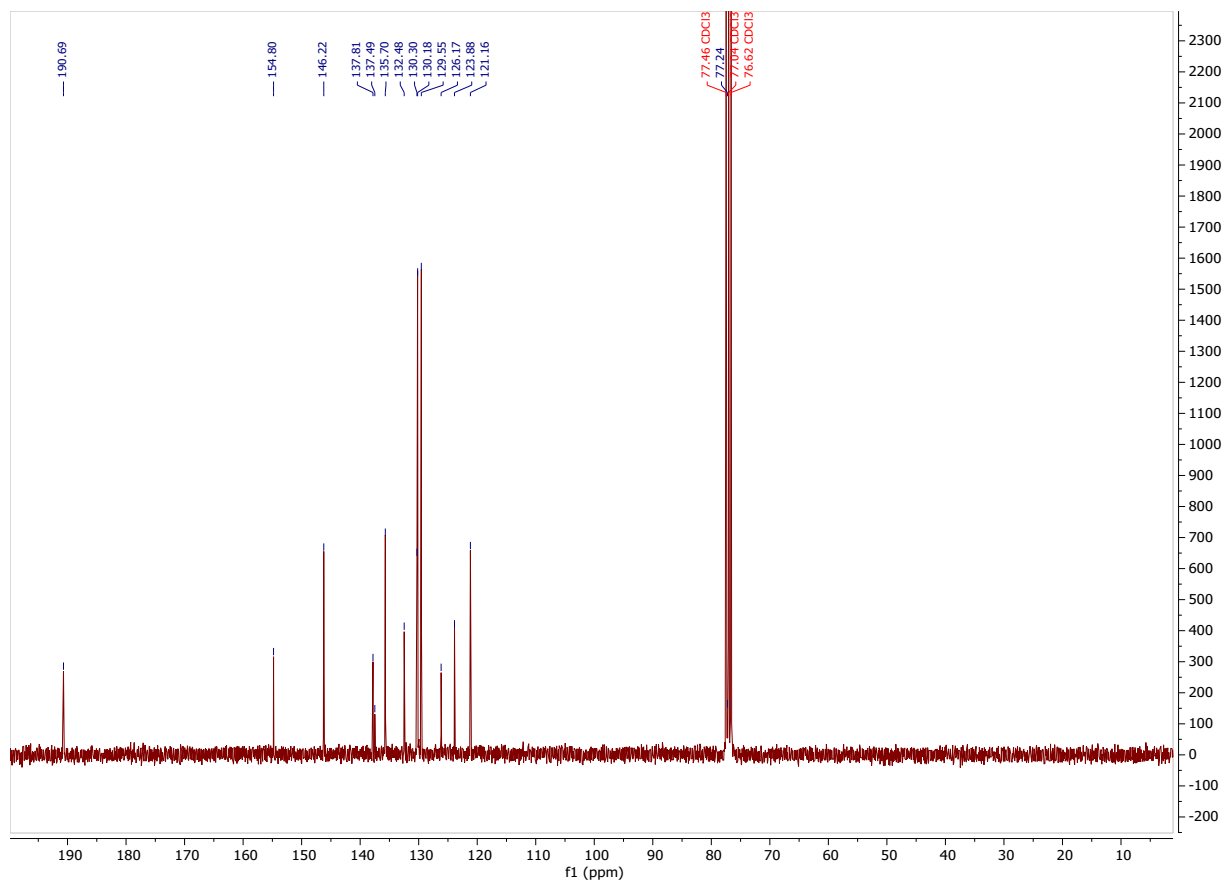

# <sup>1</sup>H-NMR (600 MHz, DMSO-d<sub>6</sub>) Spectrum of Compound 3

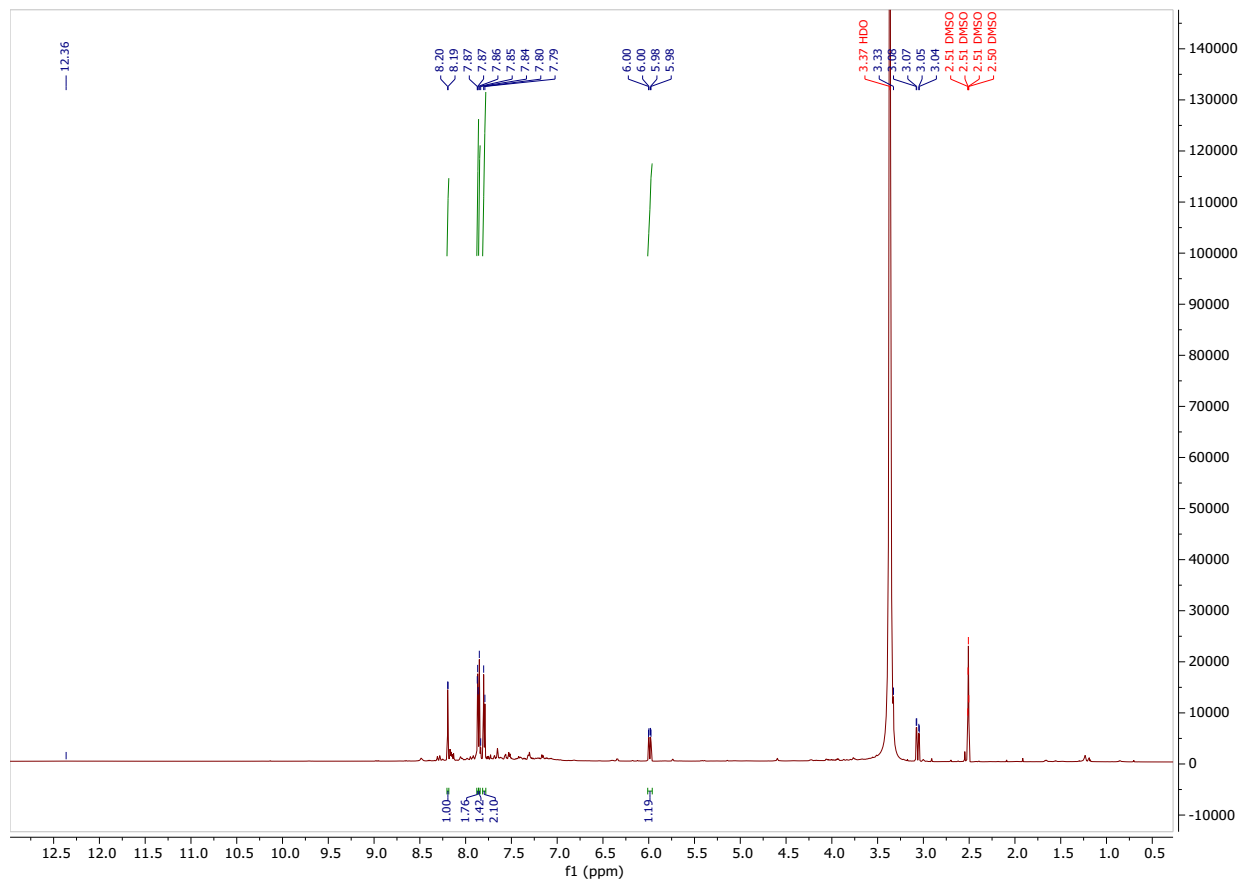

# $^{13}\text{C}$ -NMR (151 MHz, DMSO- $d_6$ ) Spectrum of Compound 3

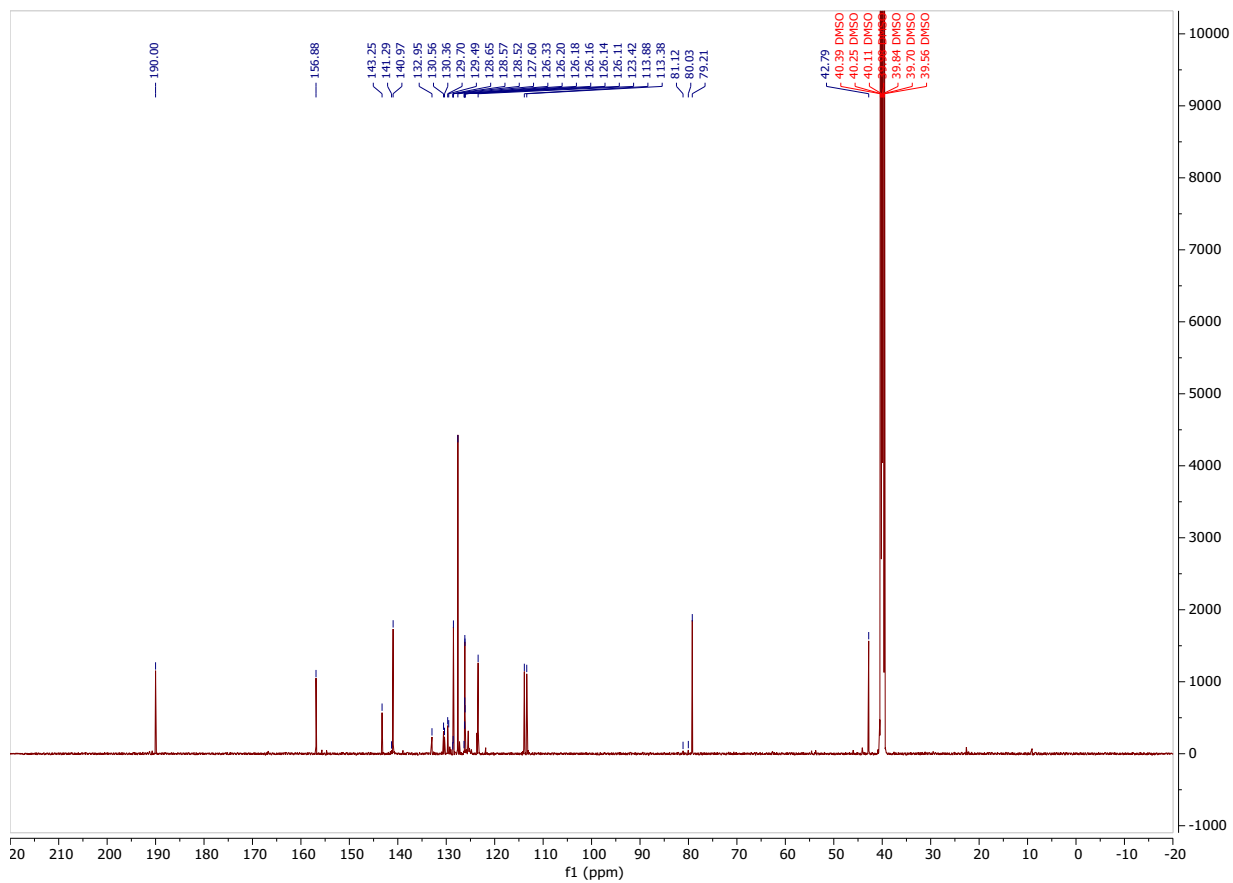

# <sup>1</sup>H-NMR (300 MHz, DMSO-d<sub>6</sub>) Spectrum of Compound 4

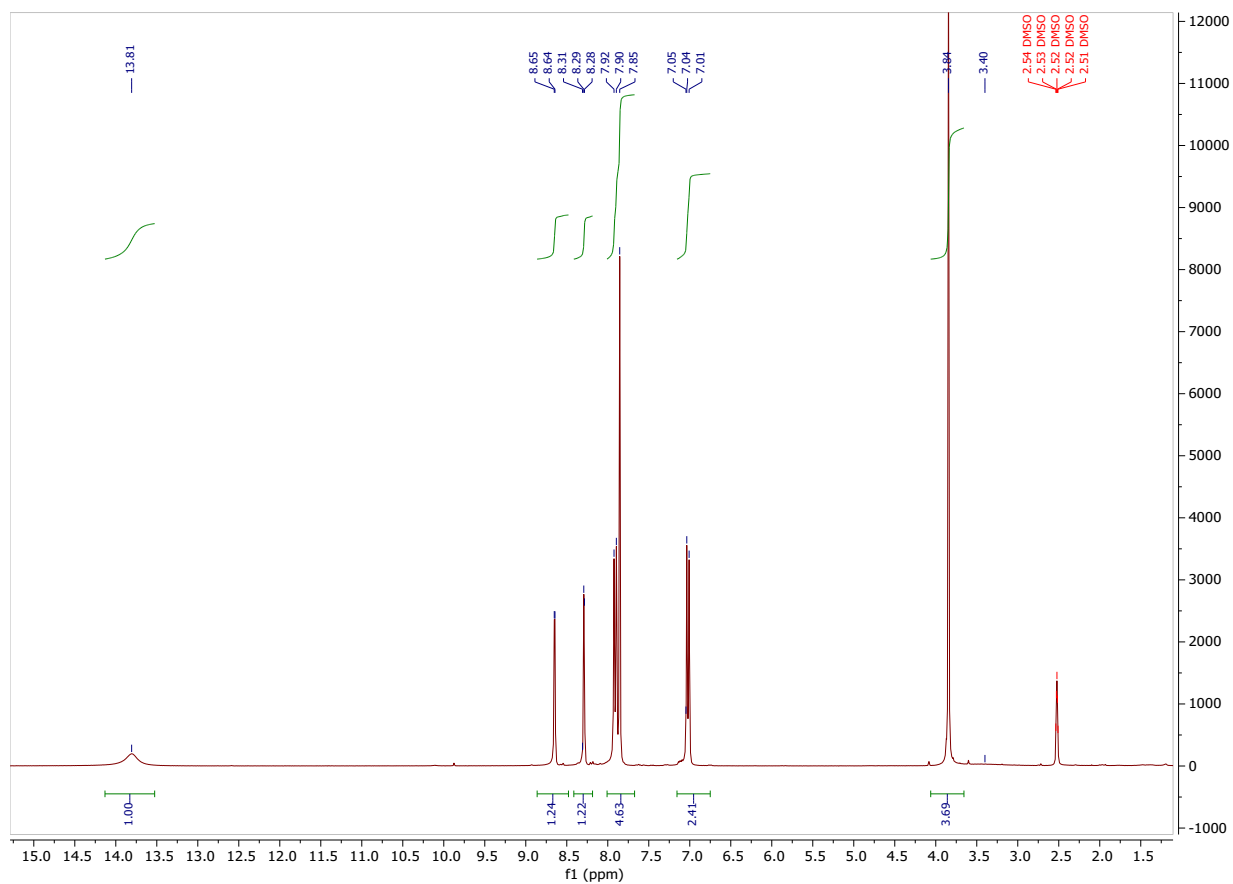

# $^{13}\text{C}$ -NMR (75 MHz, DMSO- $d_6$ ) Spectrum of Compound 4

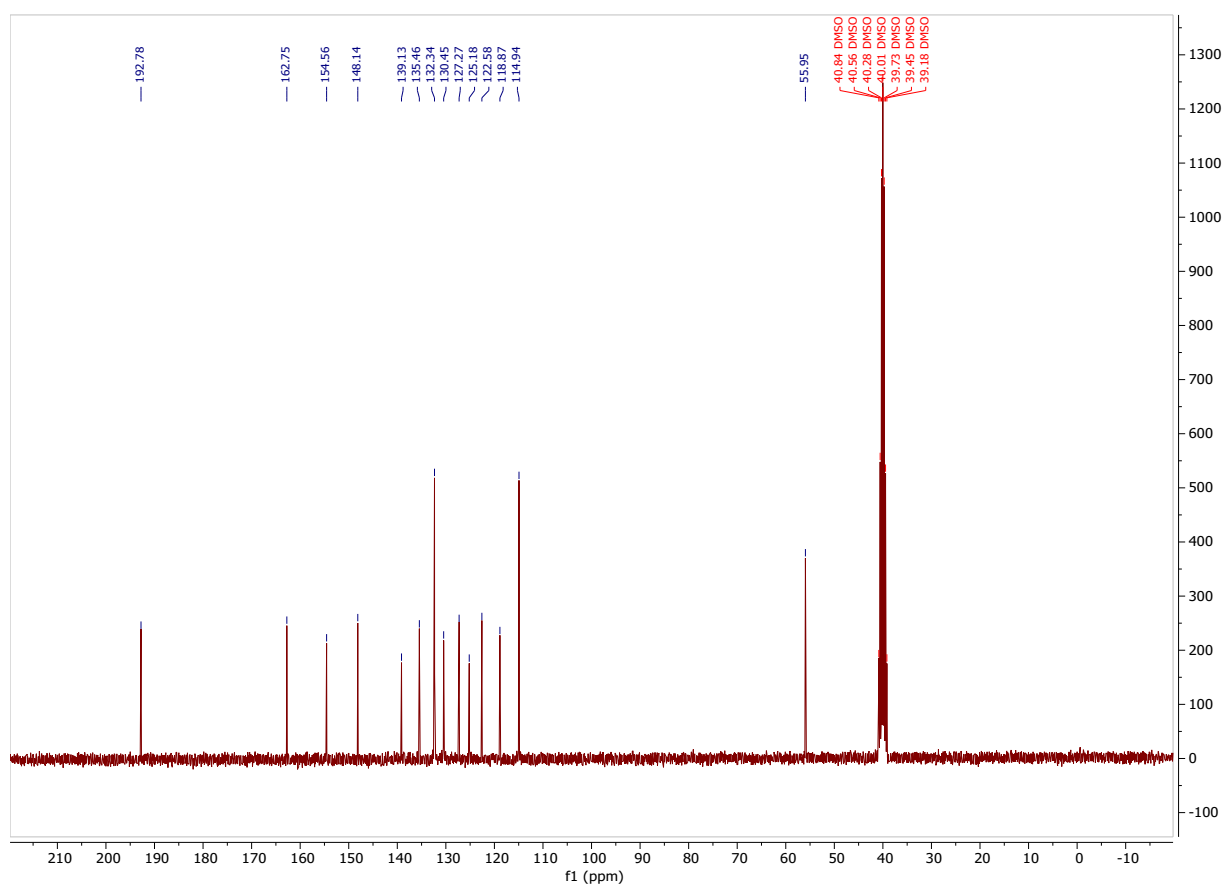

# <sup>1</sup>H-NMR (300 MHz, DMSO-d<sub>6</sub>) Spectrum of Compound 6

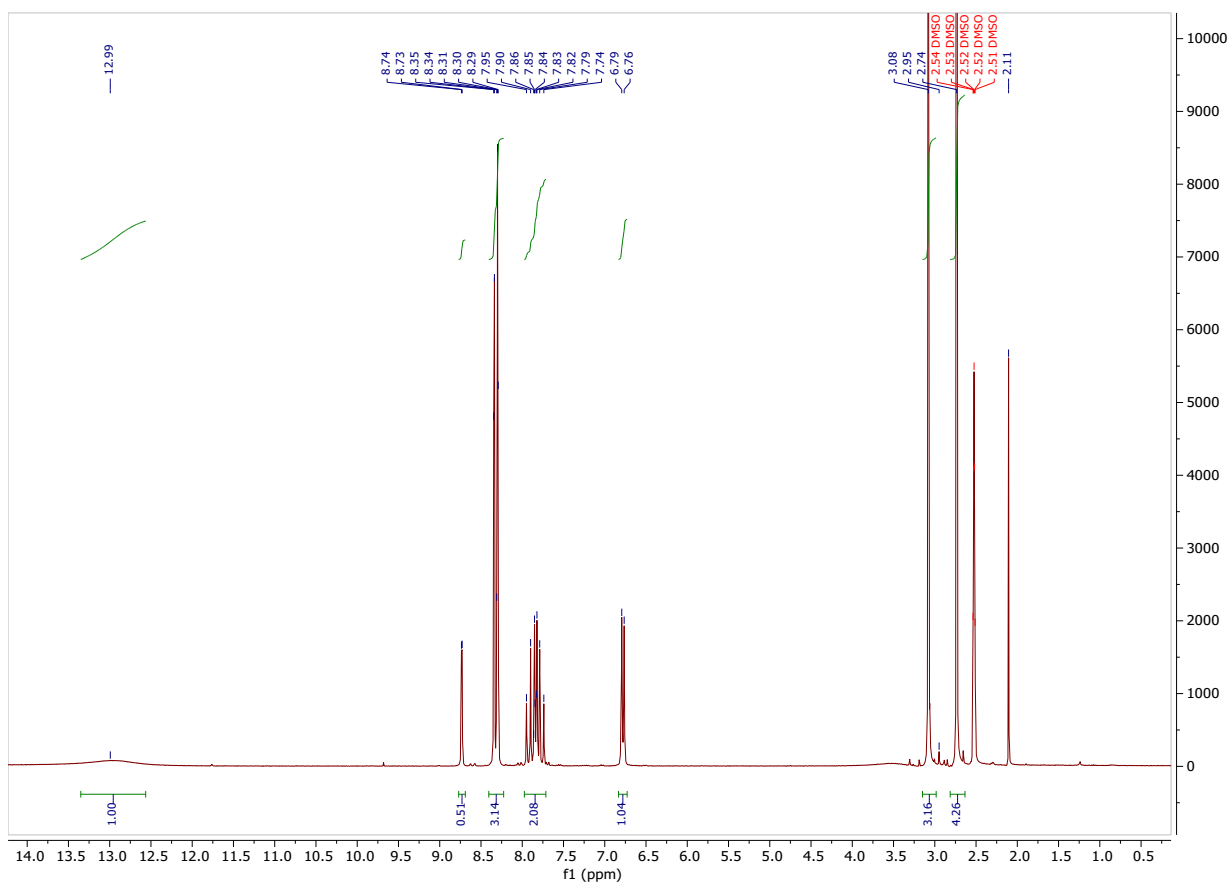



### $^{13}\text{C}$ -NMR (75 MHz, DMSO- $d_6$ ) Spectrum of Compound 6

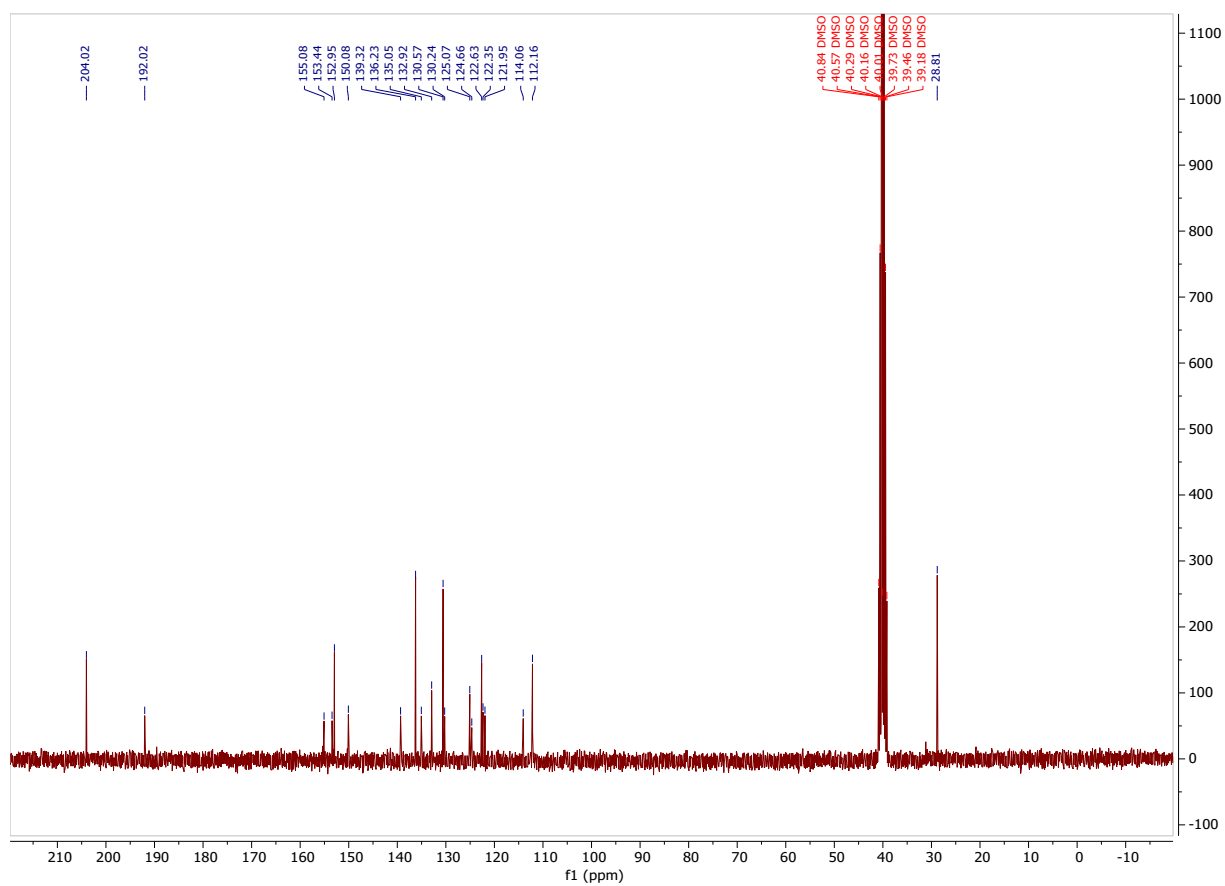

# <sup>1</sup>H-NMR (300 MHz, DMSO-d<sub>6</sub>) Spectrum of Compound 7

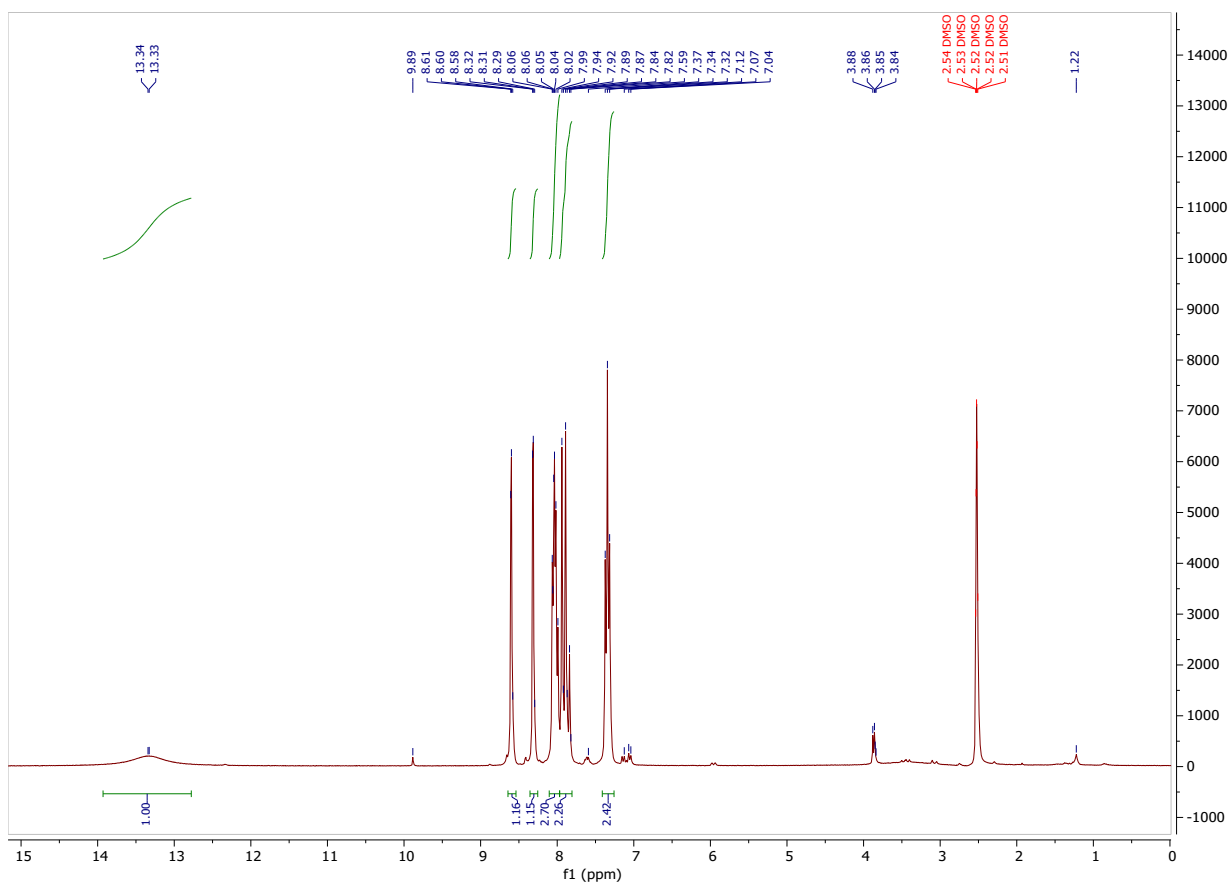

### $^{13}\text{C}$ -NMR (75 MHz, DMSO- $d_6$ ) Spectrum of Compound 7

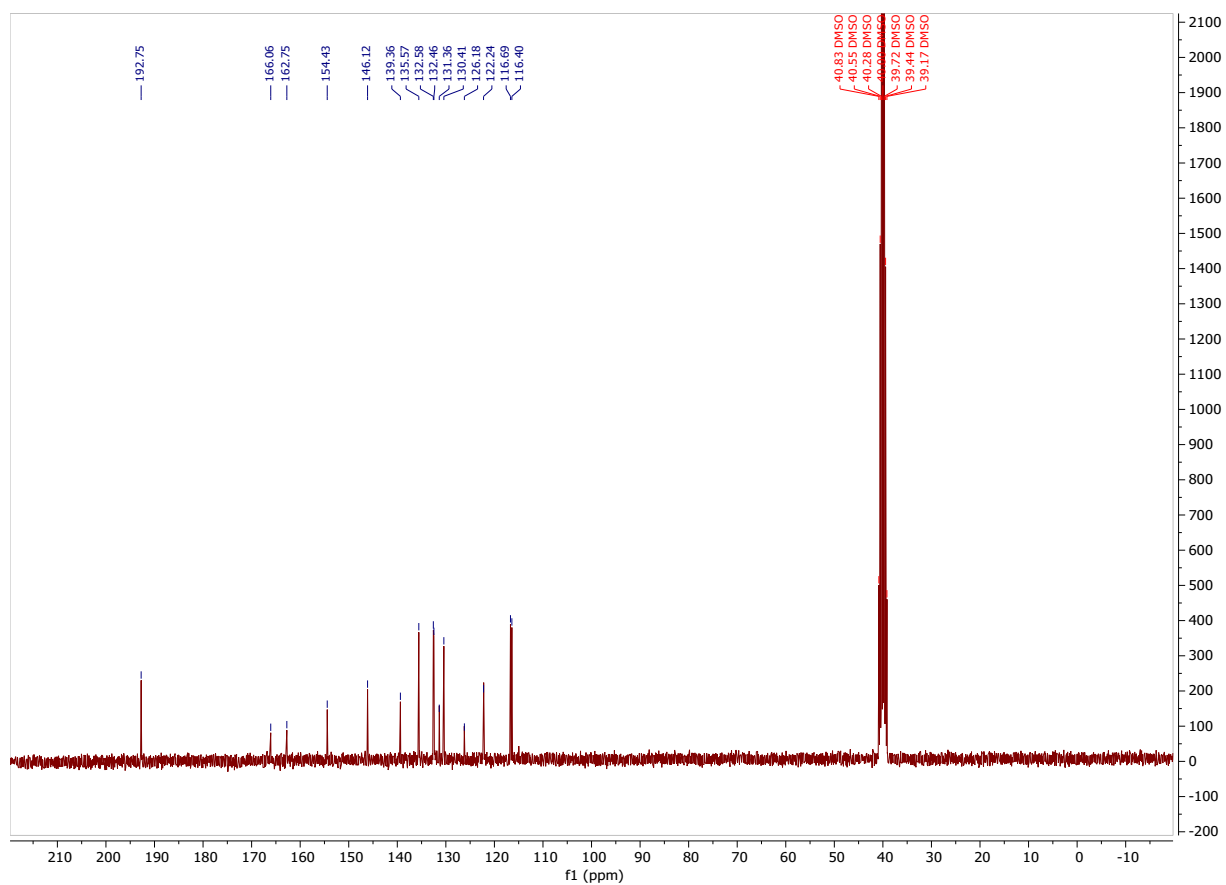

# <sup>1</sup>H-NMR (600 MHz, DMSO-d<sub>6</sub>) Spectrum of Compound 8

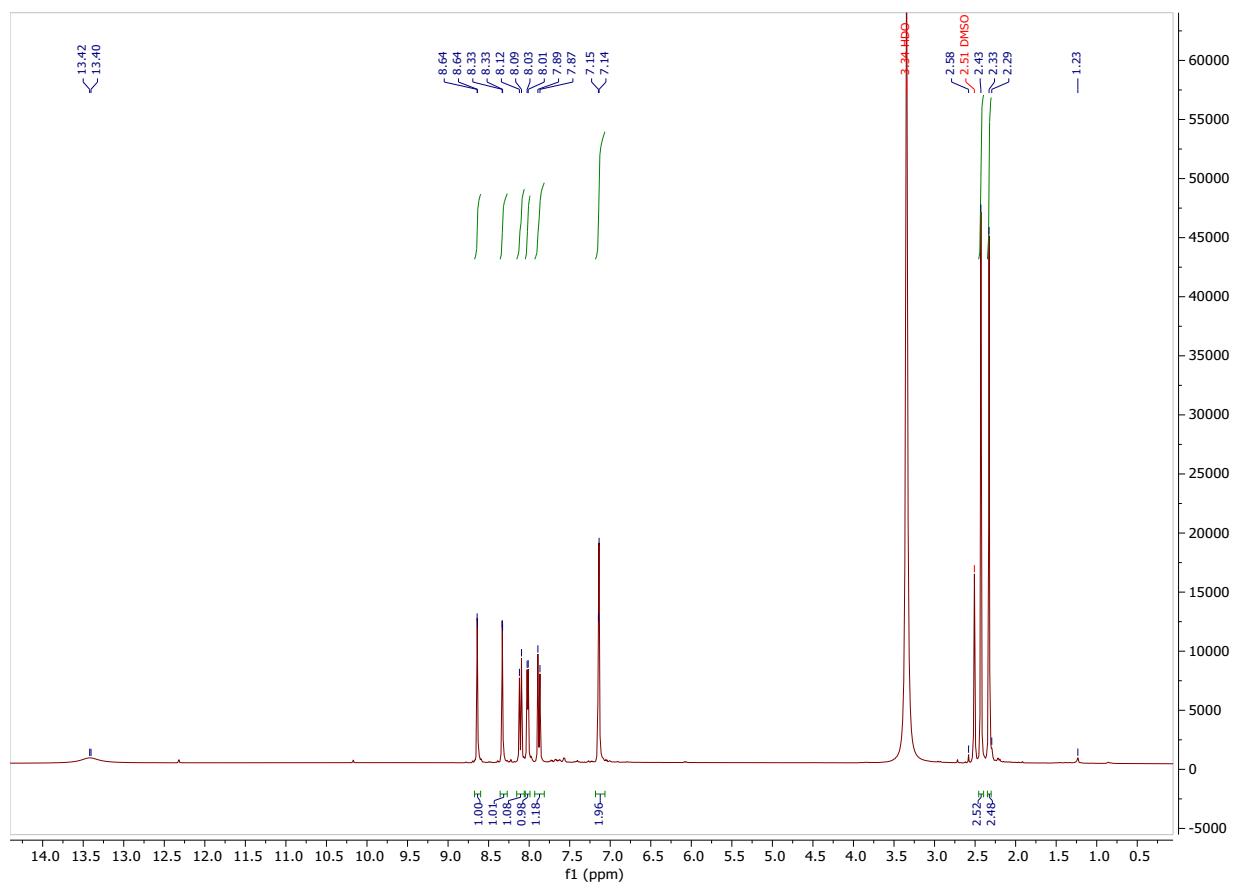

**$^{13}\text{C}$ -NMR (151 MHz, DMSO- $d_6$ ) Spectrum of Compound 8**

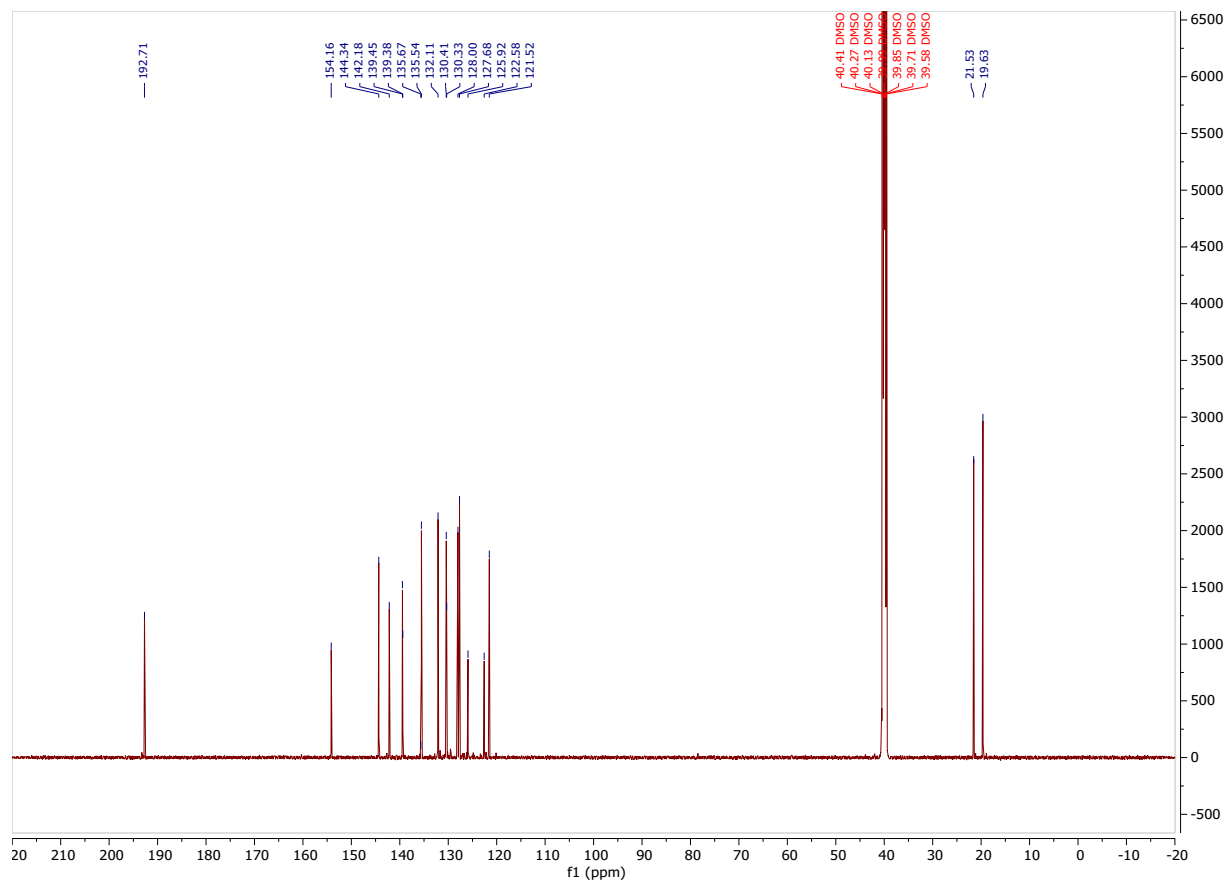

**<sup>1</sup>H-NMR (600 MHz, DMSO-d<sub>6</sub>) Spectrum of Compound 9**

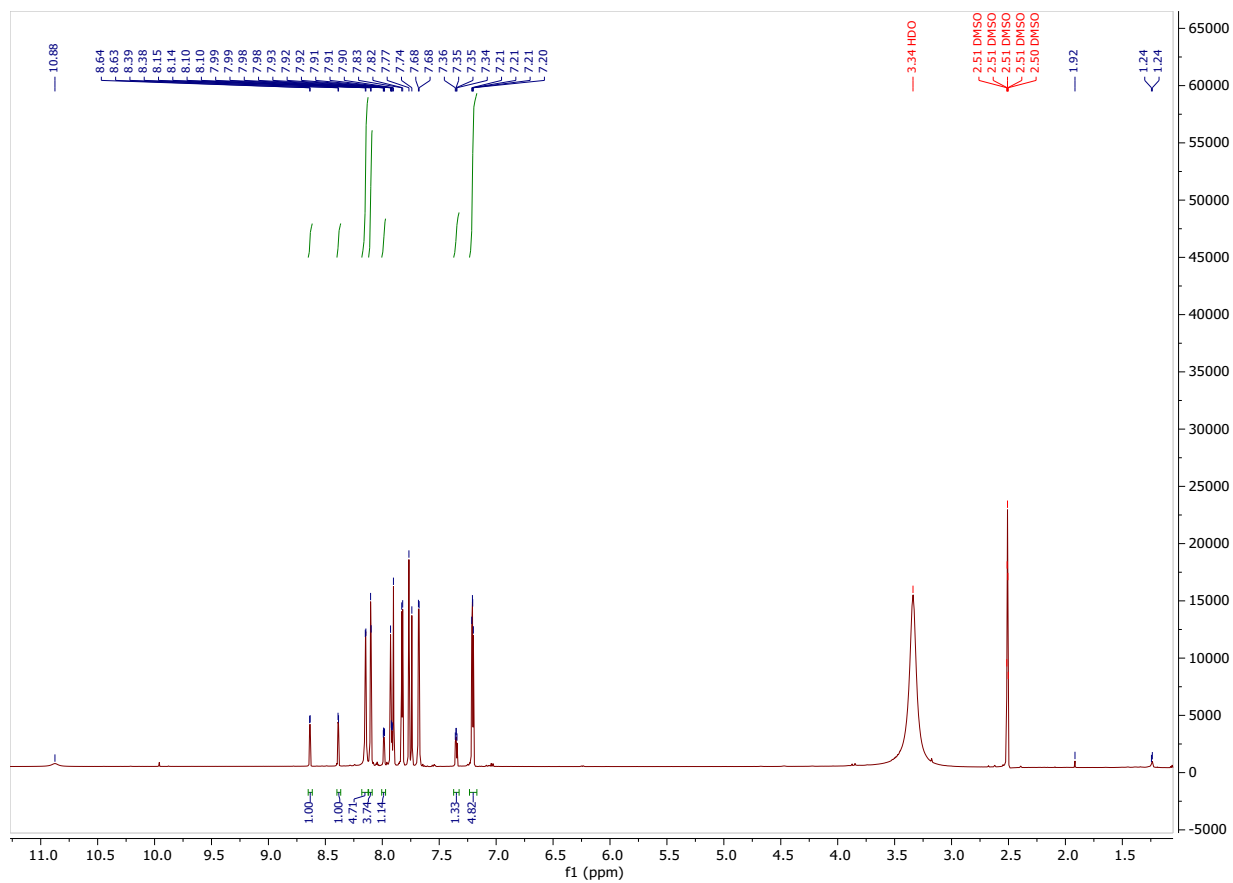

**<sup>13</sup>C-NMR (151 MHz, DMSO-d<sub>6</sub>) Spectrum of Compound 9**

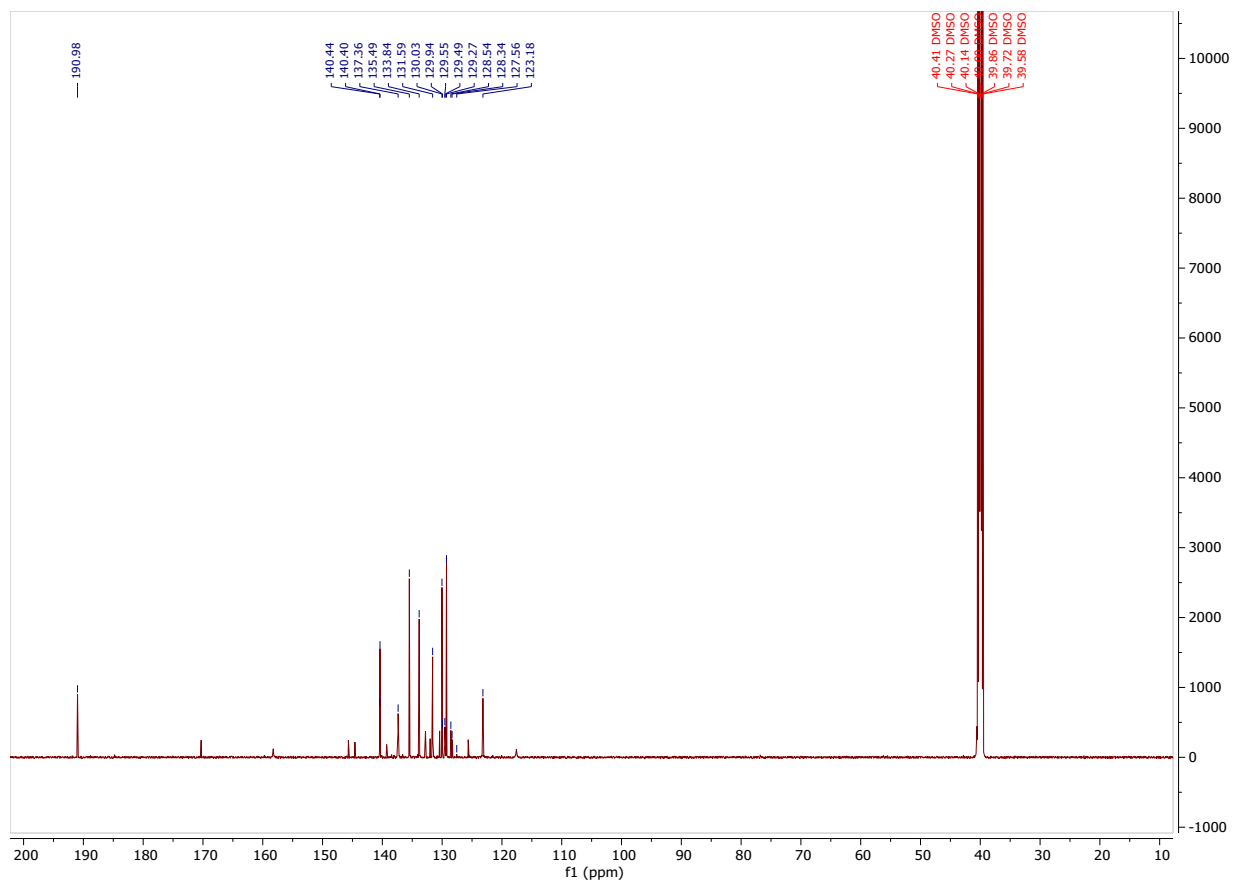

**<sup>1</sup>H-NMR (300 MHz, DMSO-d<sub>6</sub>) Spectrum of Compound 10**



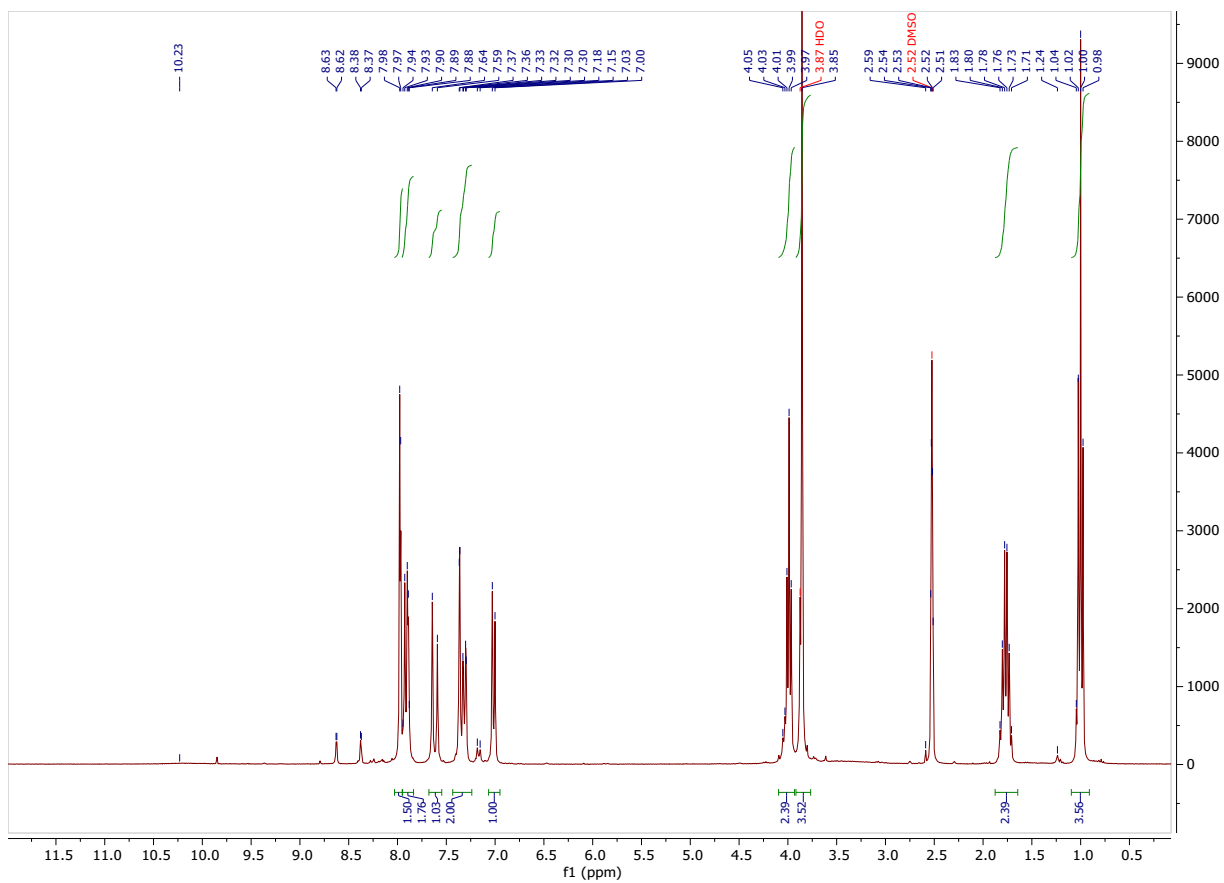

**$^{13}\text{C}$ -NMR (75 MHz, DMSO- $d_6$ ) Spectrum of Compound 10**

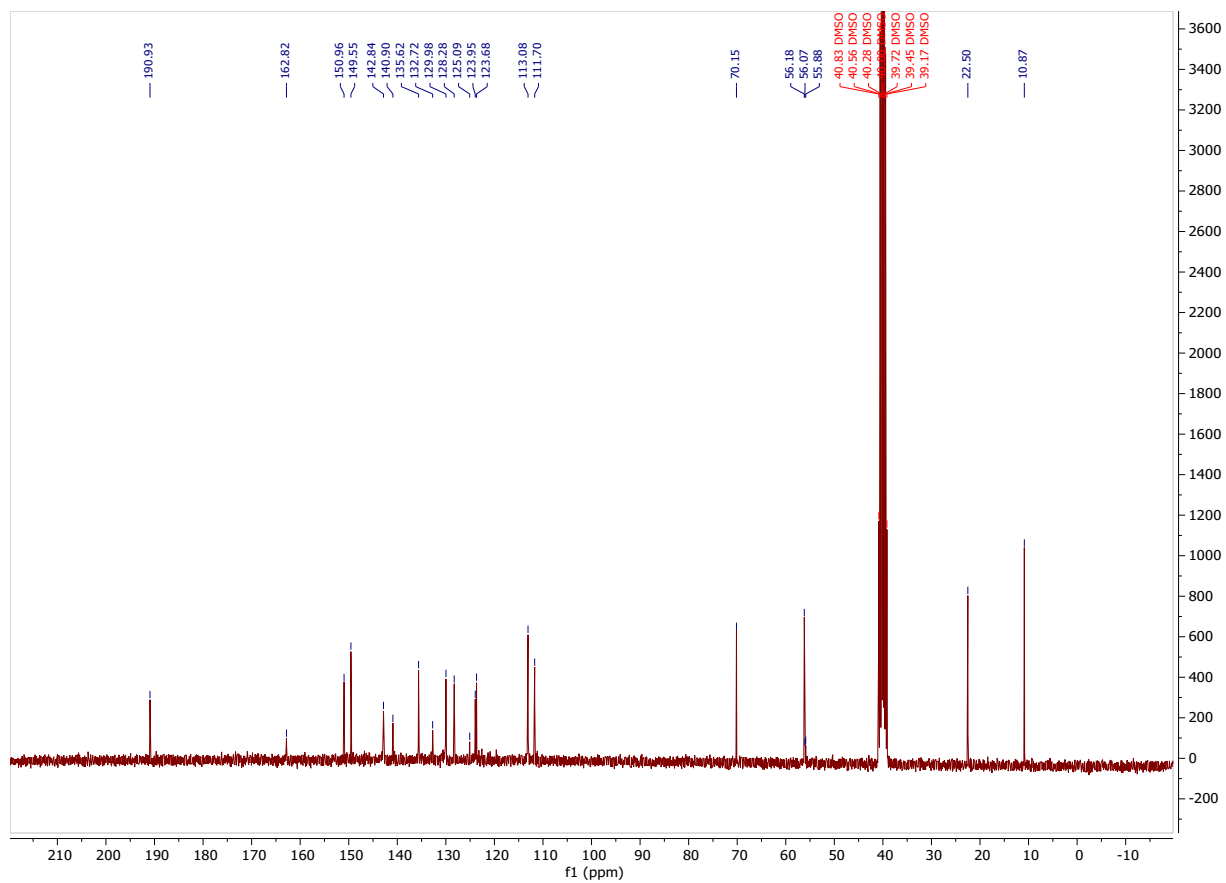

# <sup>1</sup>H-NMR (300 MHz, DMSO-d<sub>6</sub>) Spectrum of Compound 11

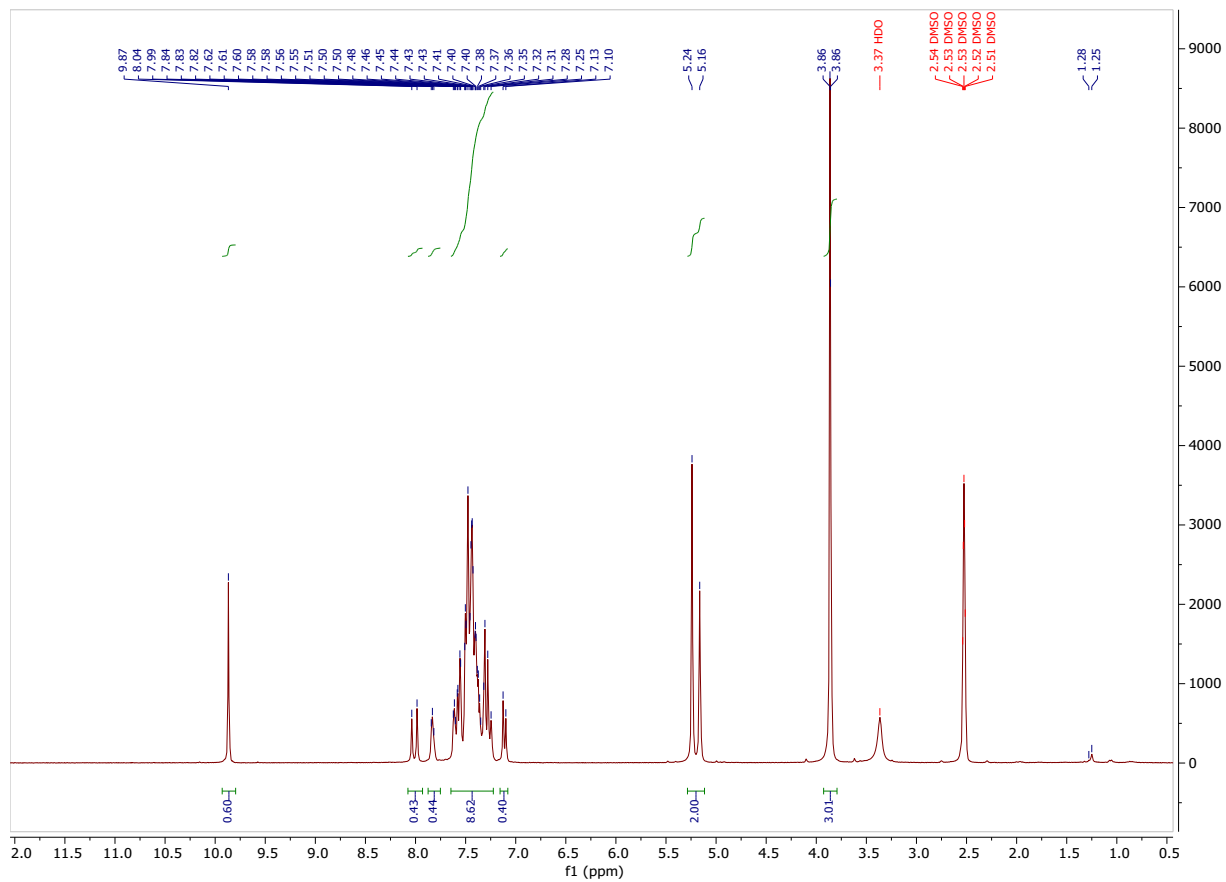

# $^{13}\text{C}$ -NMR (75 MHz, DMSO- $d_6$ ) Spectrum of Compound 11

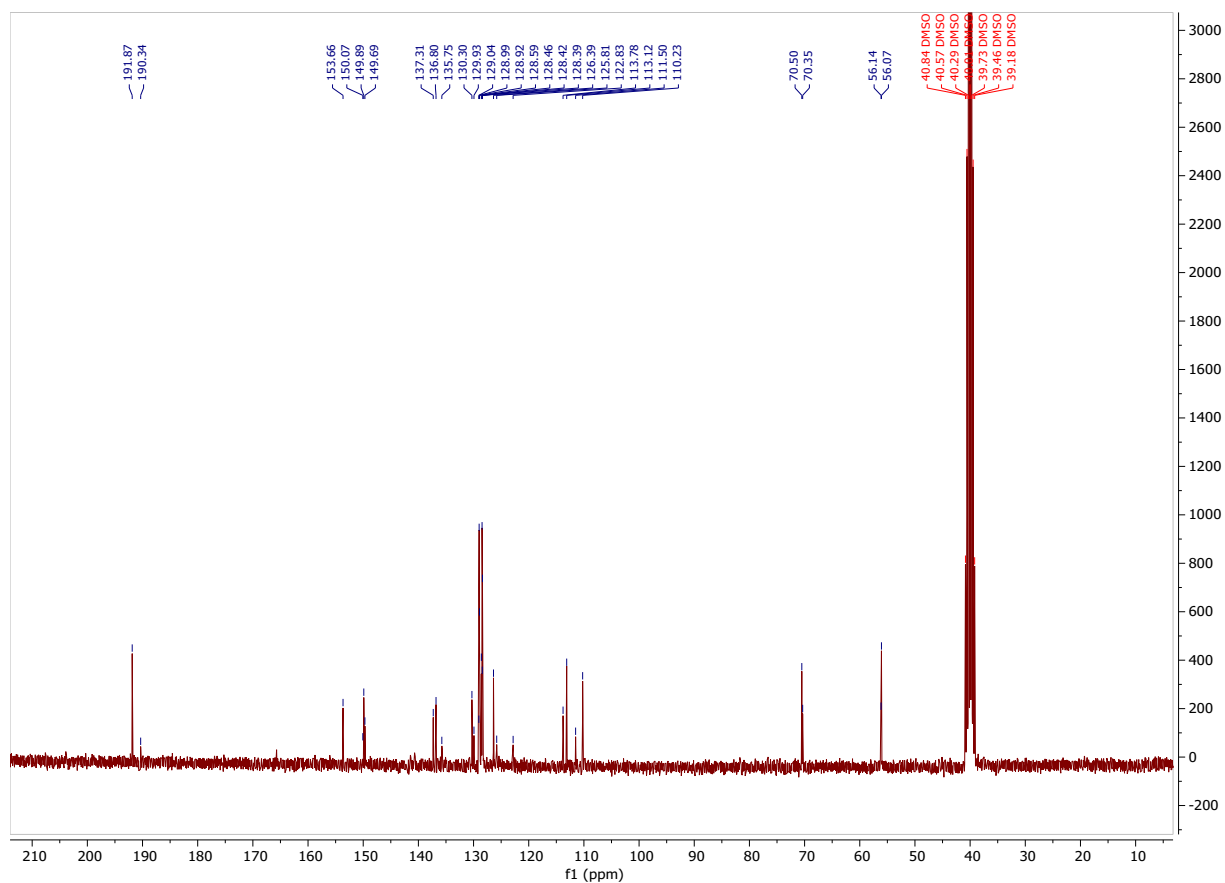

# <sup>1</sup>H-NMR (600 MHz, DMSO-d<sub>6</sub>) Spectrum of Compound 12

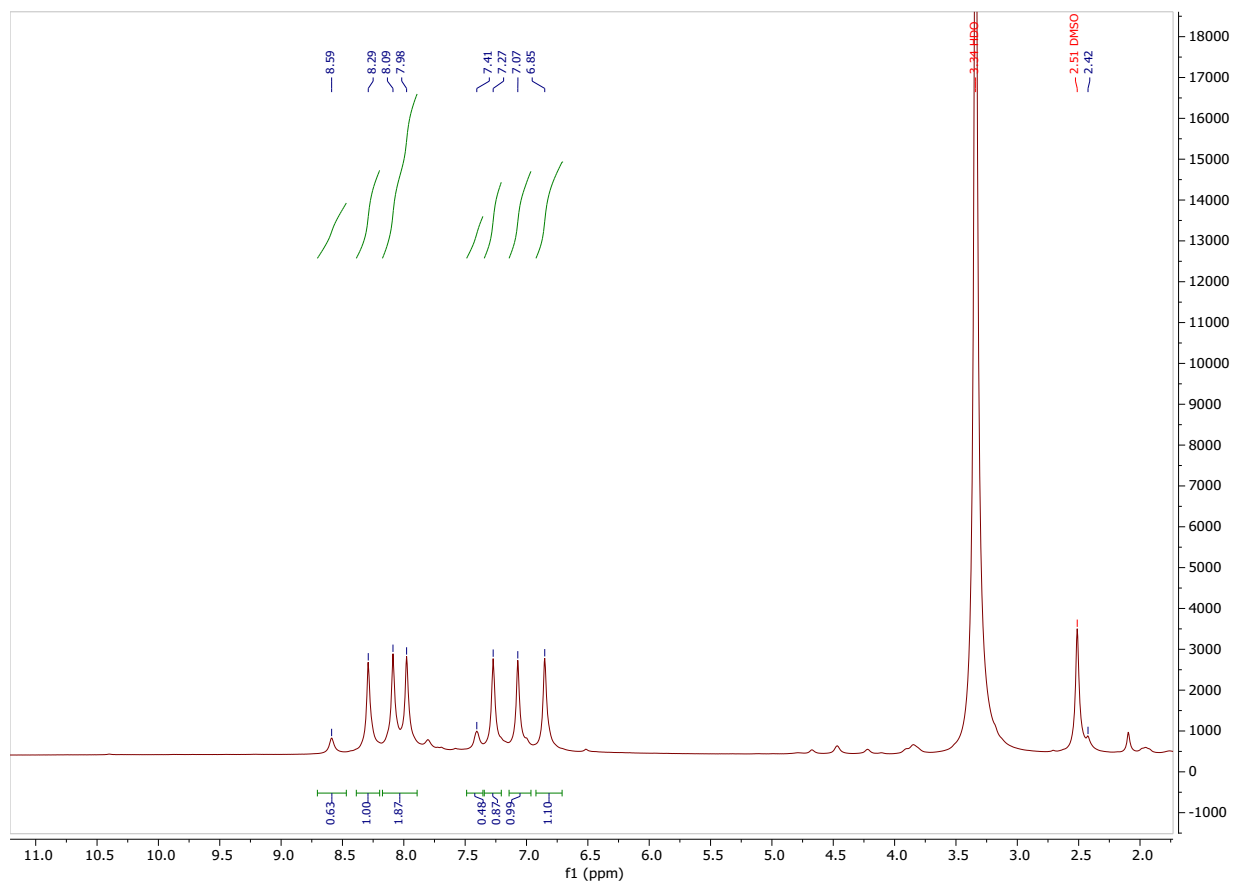

# <sup>13</sup>C-NMR (151 MHz, DMSO-d<sub>6</sub>) Spectrum of Compound 12

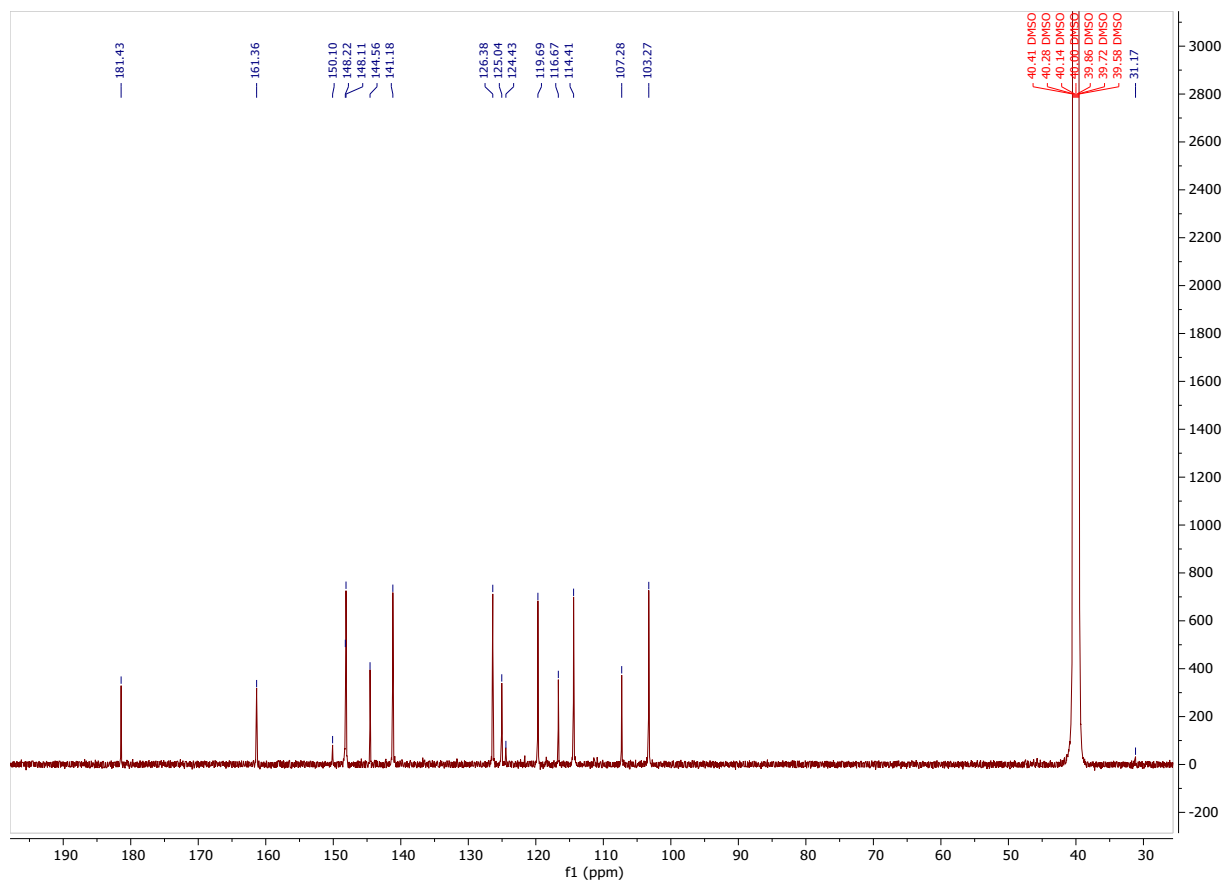

# <sup>1</sup>H-NMR (300 MHz, DMSO-d<sub>6</sub>) Spectrum of Compound 13

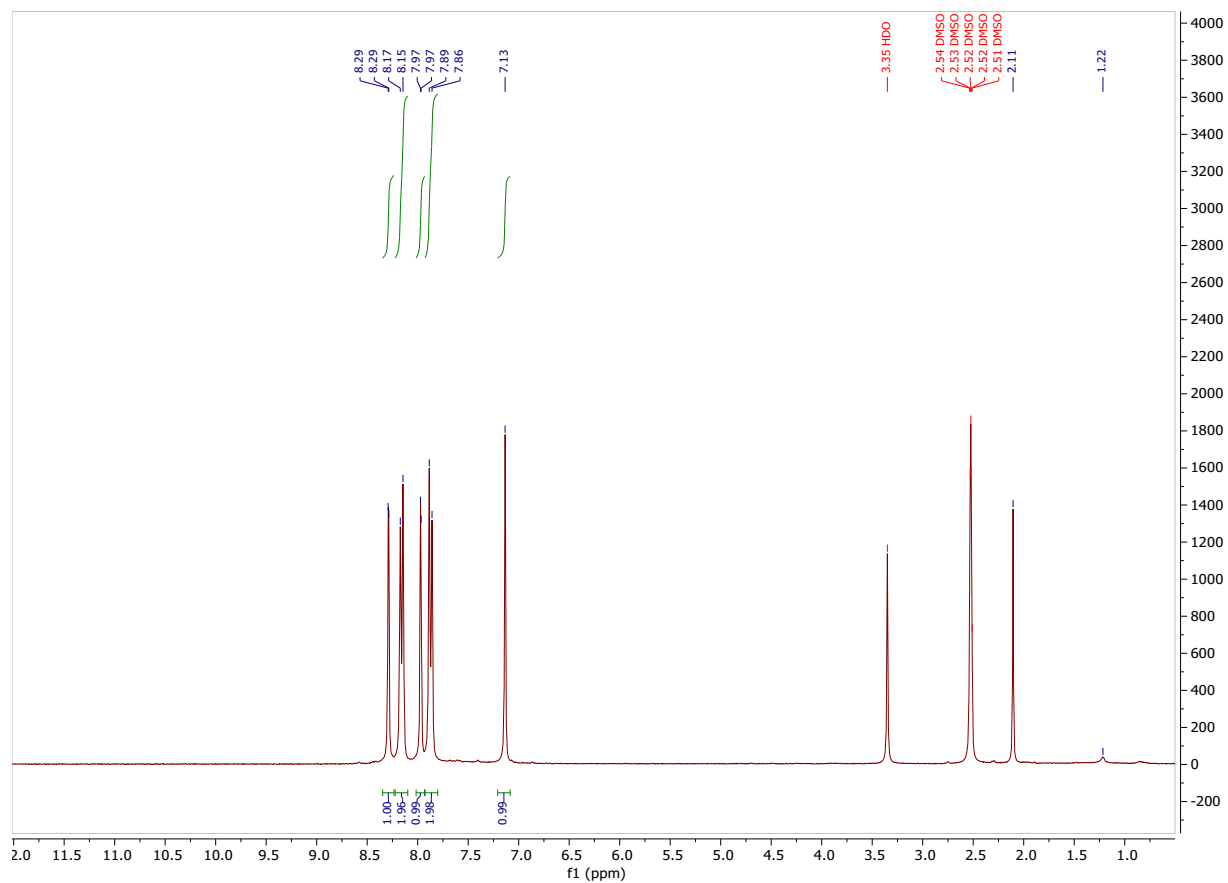

# $^{13}\text{C}$ -NMR (75 MHz, DMSO- $\text{d}_6$ ) Spectrum of Compound 13

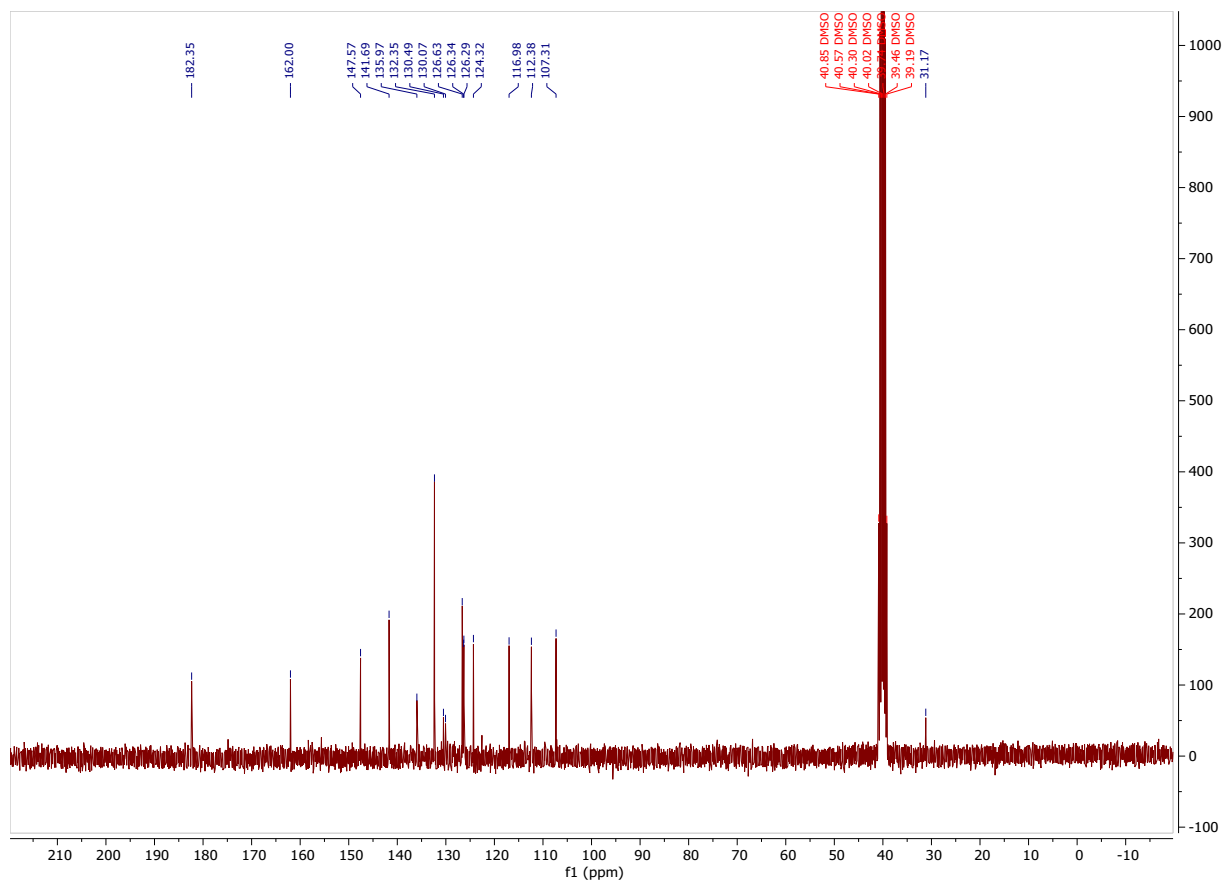



# <sup>1</sup>H-NMR (600 MHz, DMSO-d<sub>6</sub>) Spectrum of Compound 14

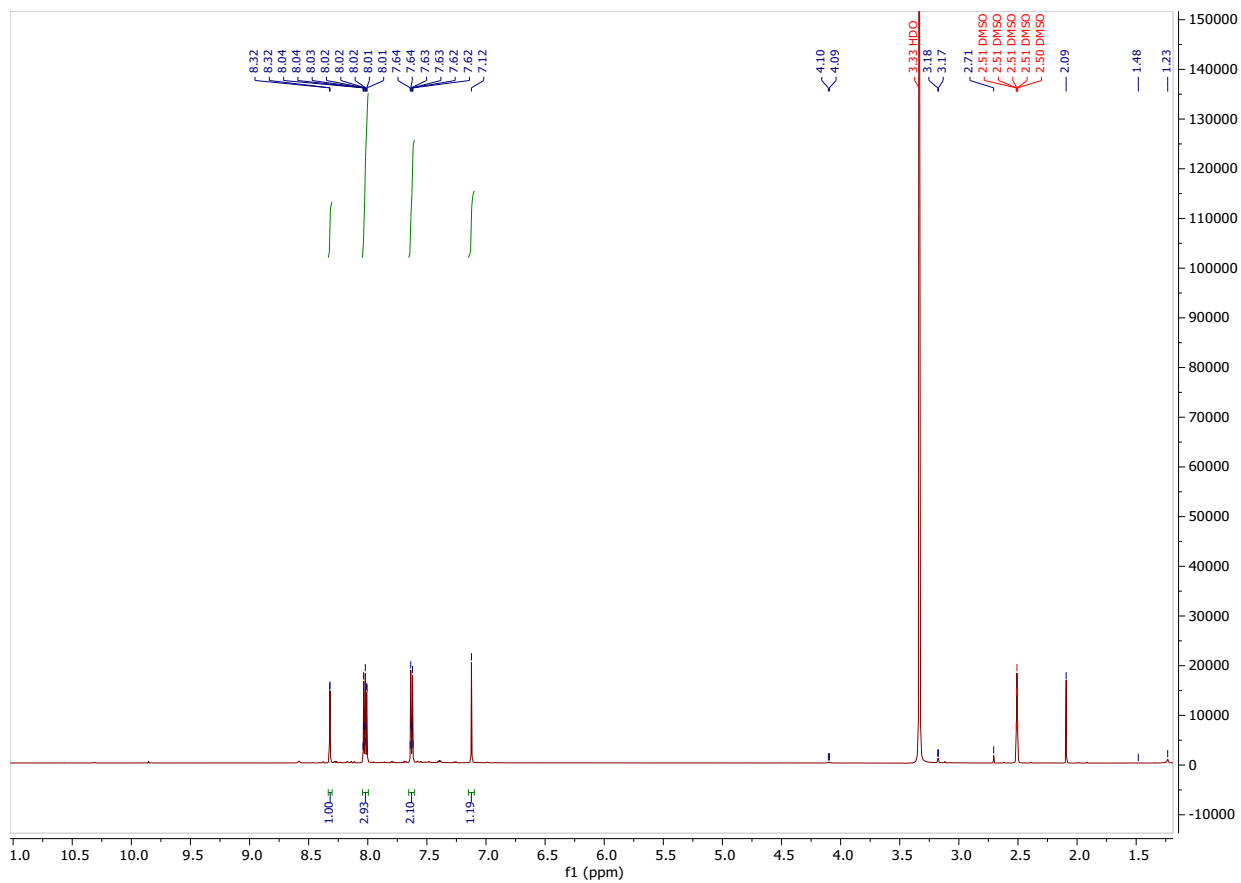

# $^{13}\text{C}$ -NMR (151 MHz, DMSO- $d_6$ ) Spectrum of Compound 14

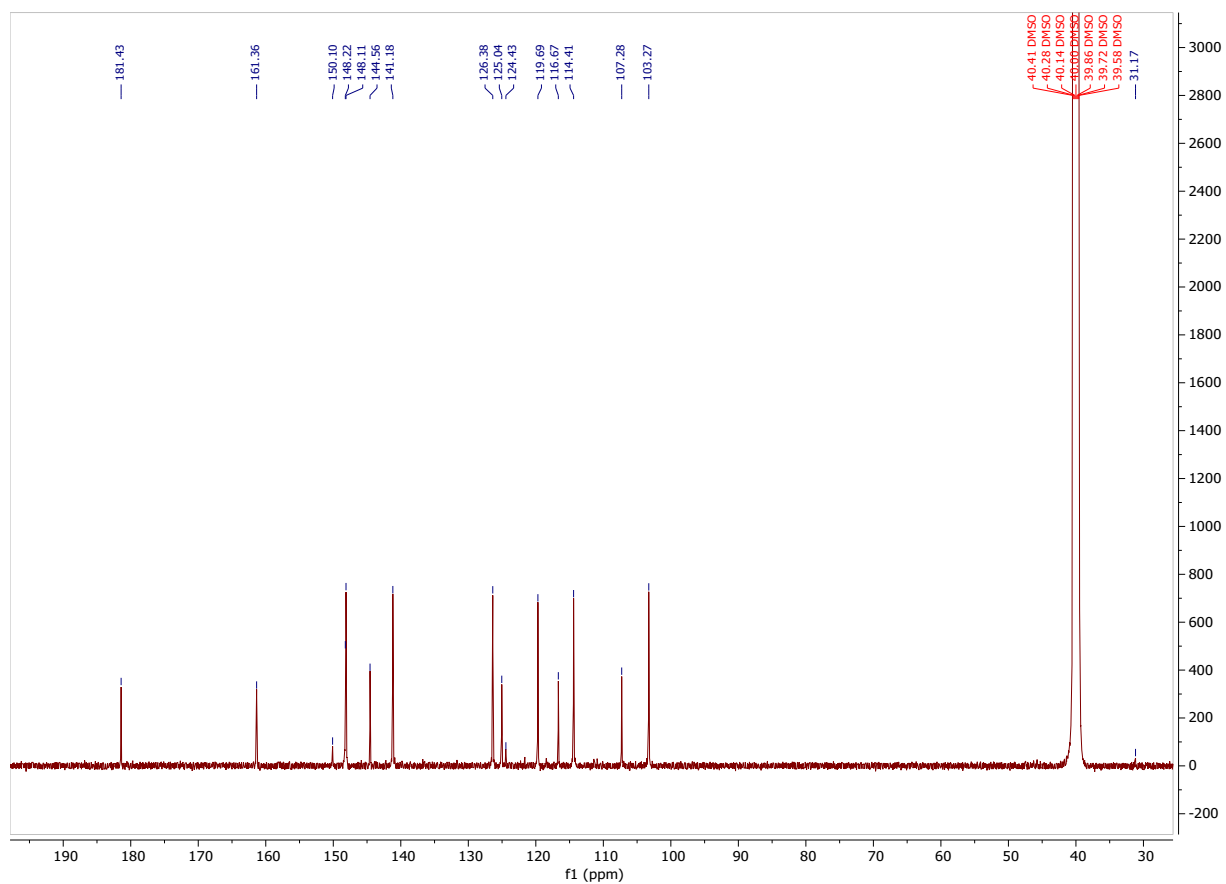

# <sup>1</sup>H-NMR (600 MHz, DMSO-d<sub>6</sub>) Spectrum of Compound 15

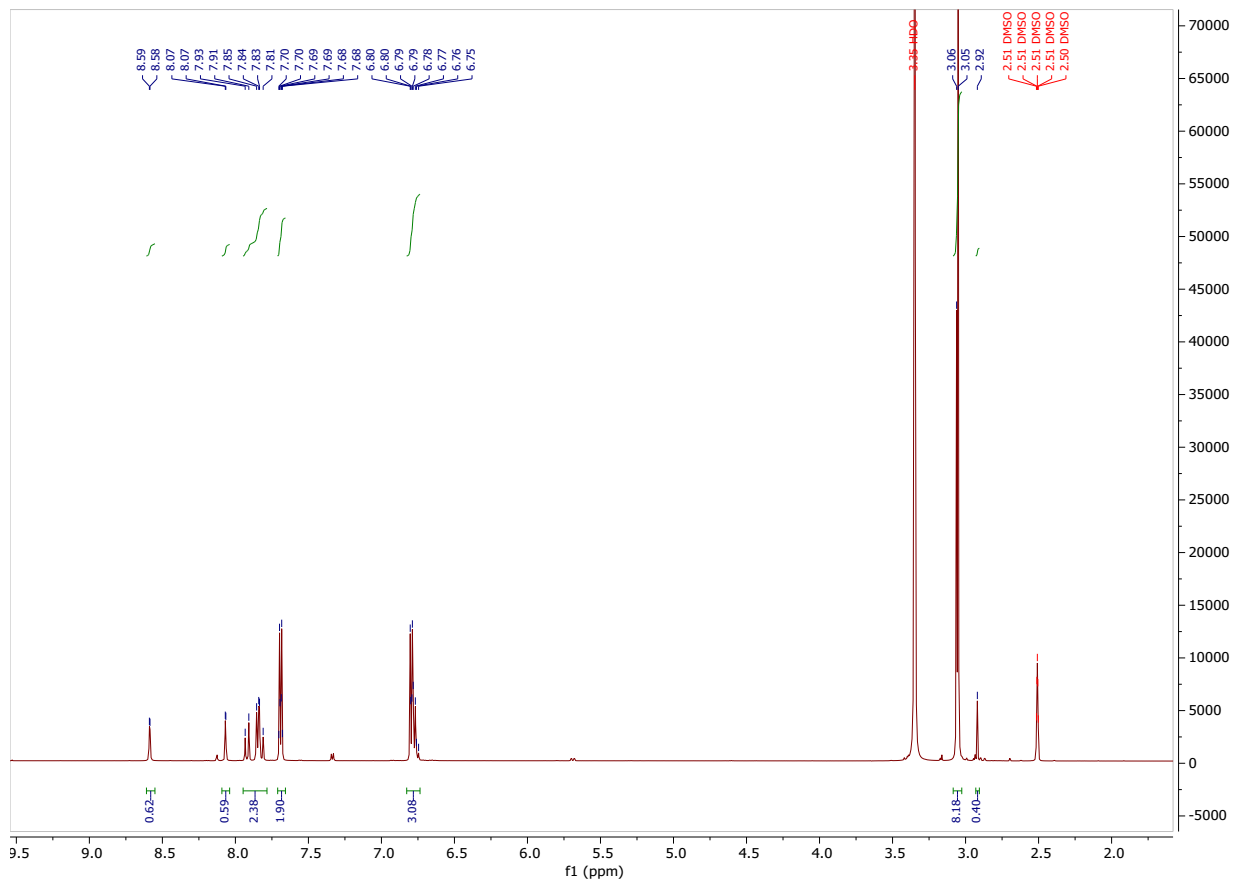

# $^{13}\text{C}$ -NMR (151 MHz, DMSO- $d_6$ ) Spectrum of Compound 15

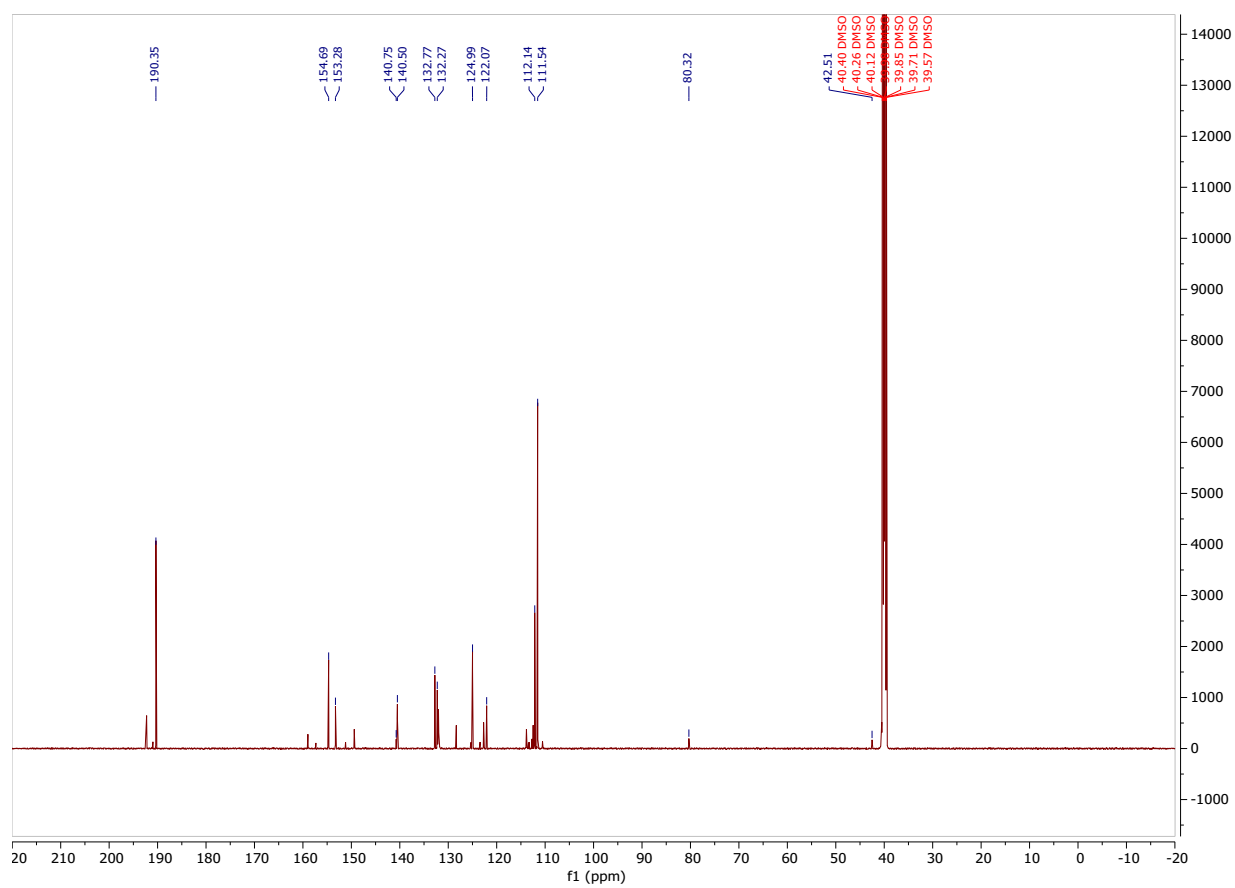

# <sup>1</sup>H-NMR (300 MHz, DMSO-d<sub>6</sub>) Spectrum of Compound 16

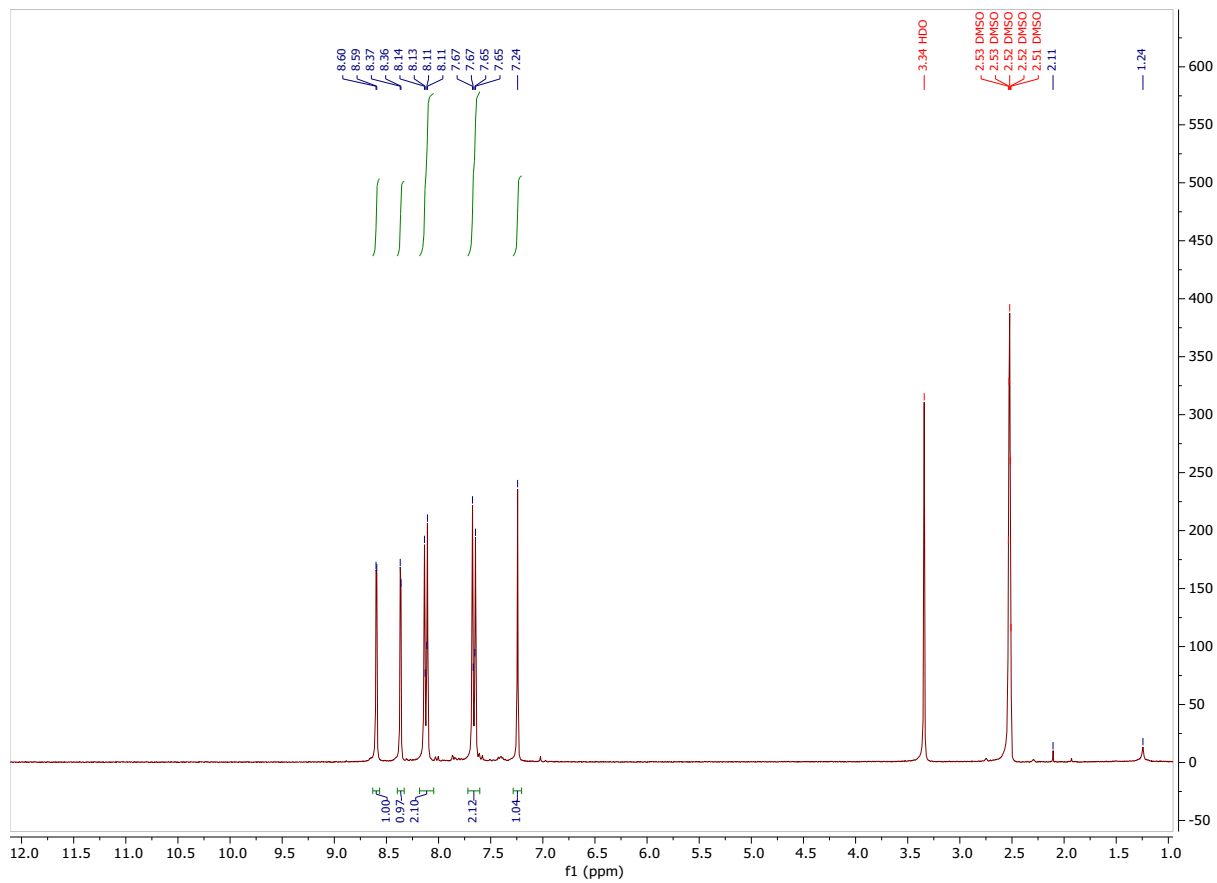

# <sup>13</sup>C-NMR (75 MHz, DMSO-d<sub>6</sub>) Spectrum of Compound 16

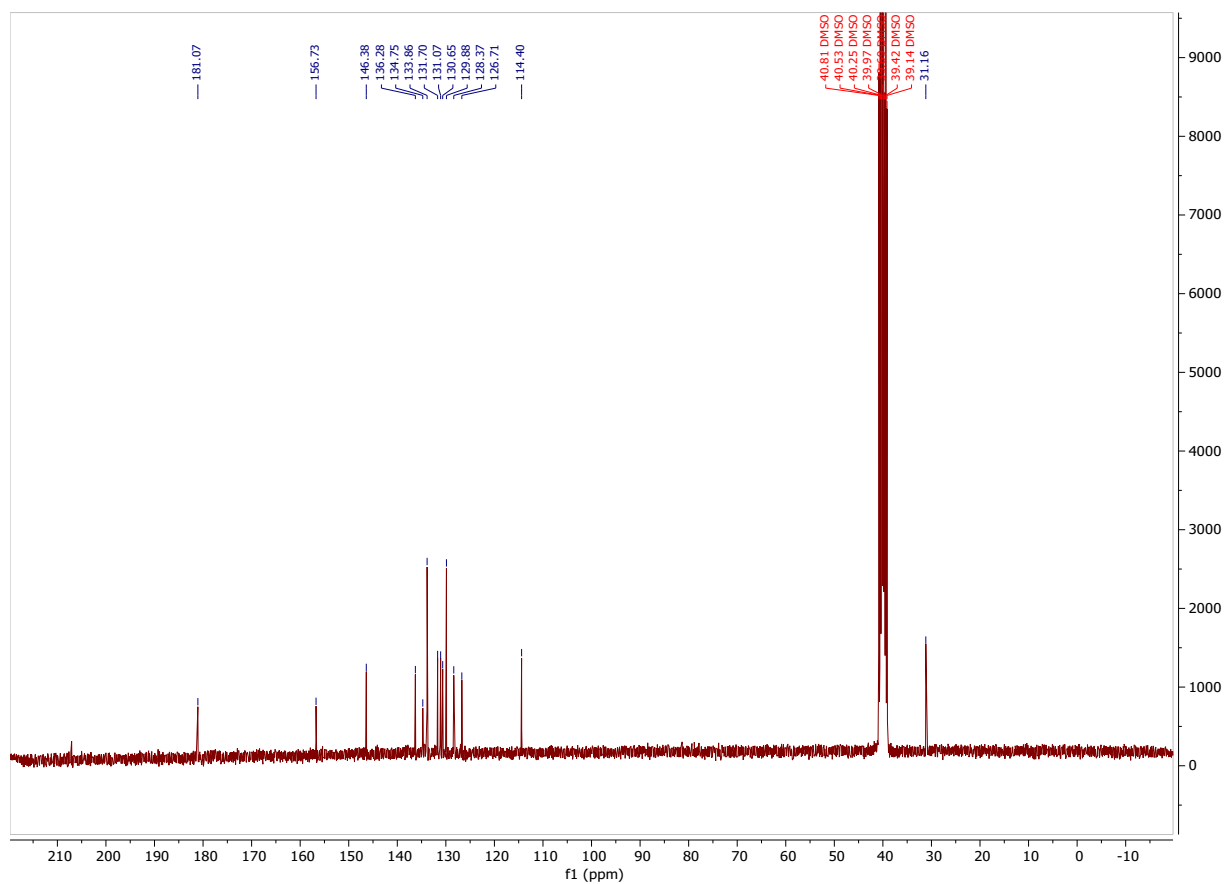

# <sup>1</sup>H-NMR (600 MHz, DMSO-d<sub>6</sub>) Spectrum of Compound 17

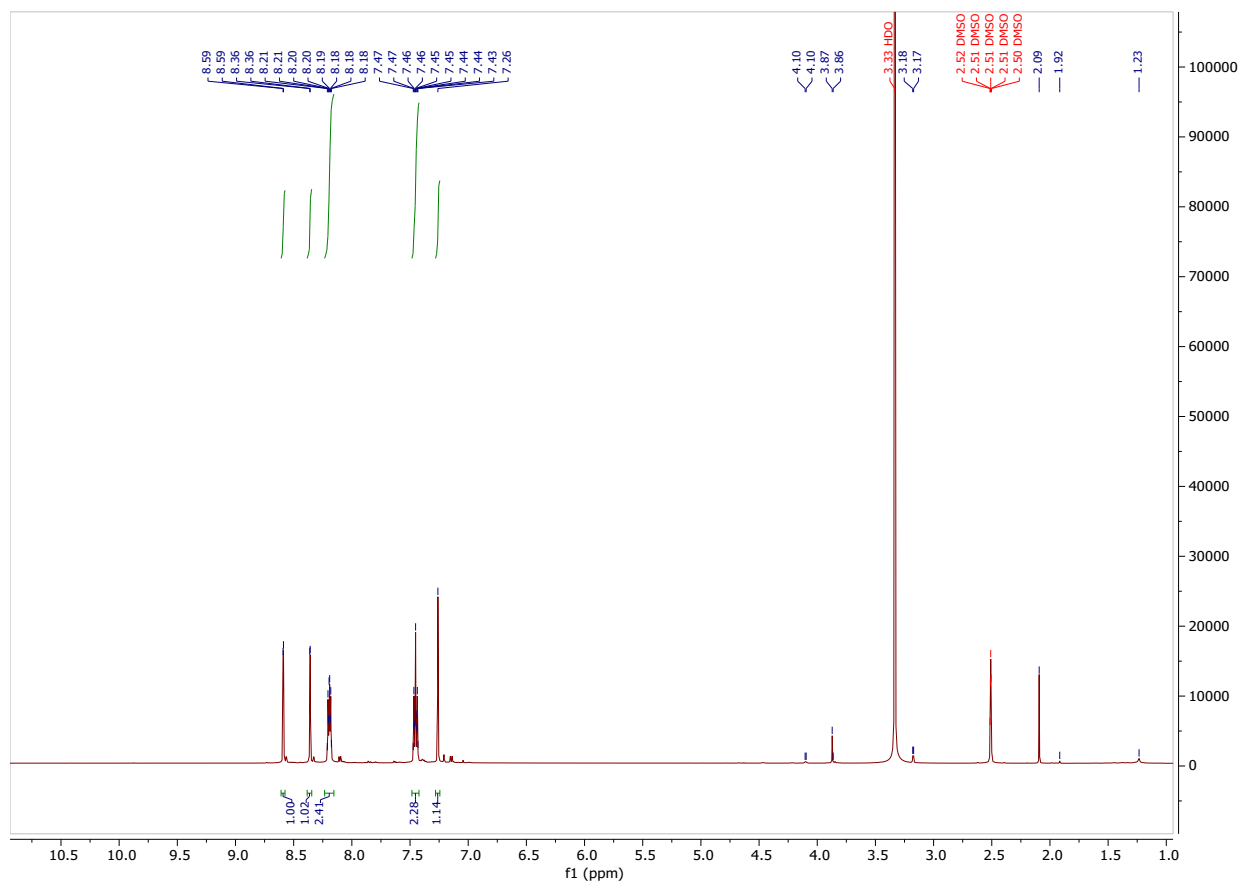

# $^{13}\text{C}$ -NMR (151 MHz, DMSO- $d_6$ ) Spectrum of Compound 17

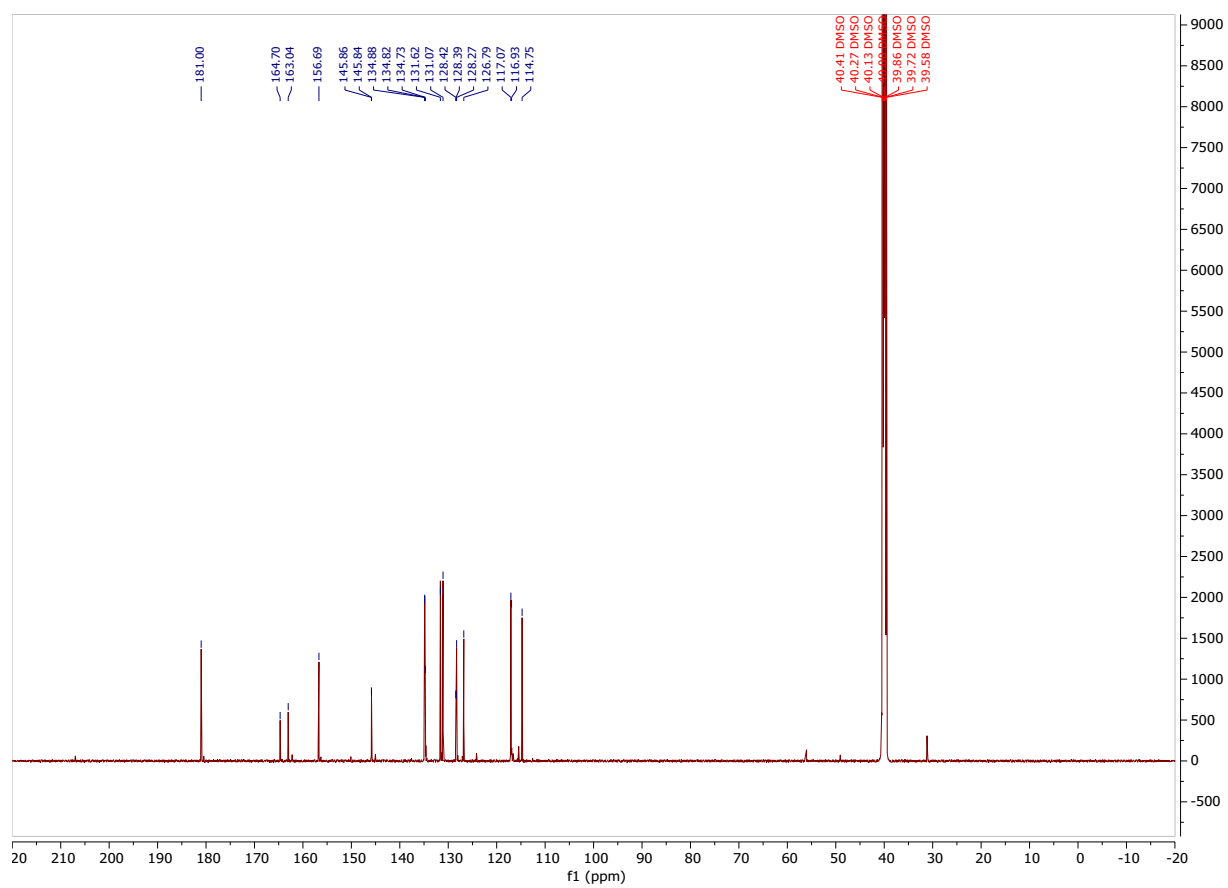



# <sup>1</sup>H-NMR (300 MHz, DMSO-d<sub>6</sub>) Spectrum of Compound 18

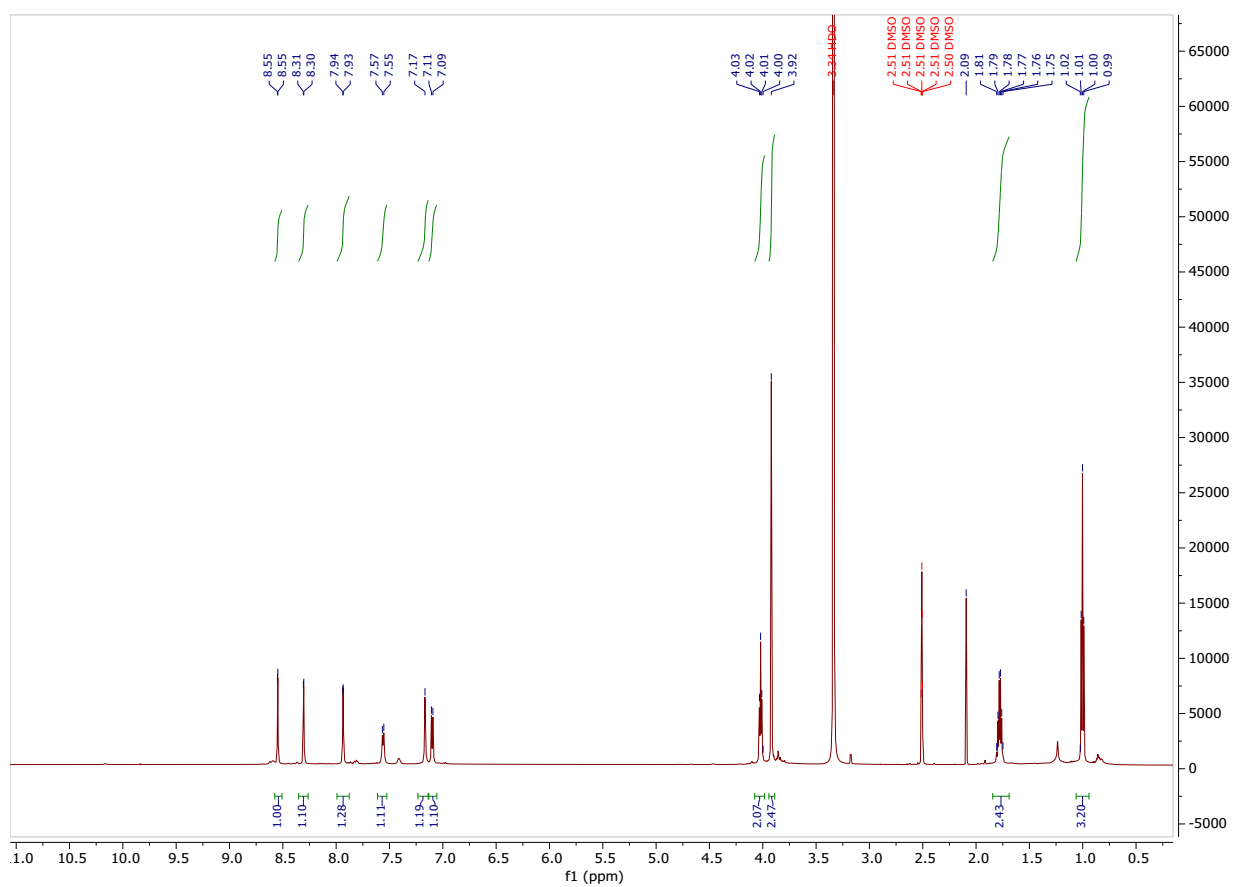

### <sup>13</sup>C-NMR (75 MHz, DMSO-d<sub>6</sub>) Spectrum of Compound 18

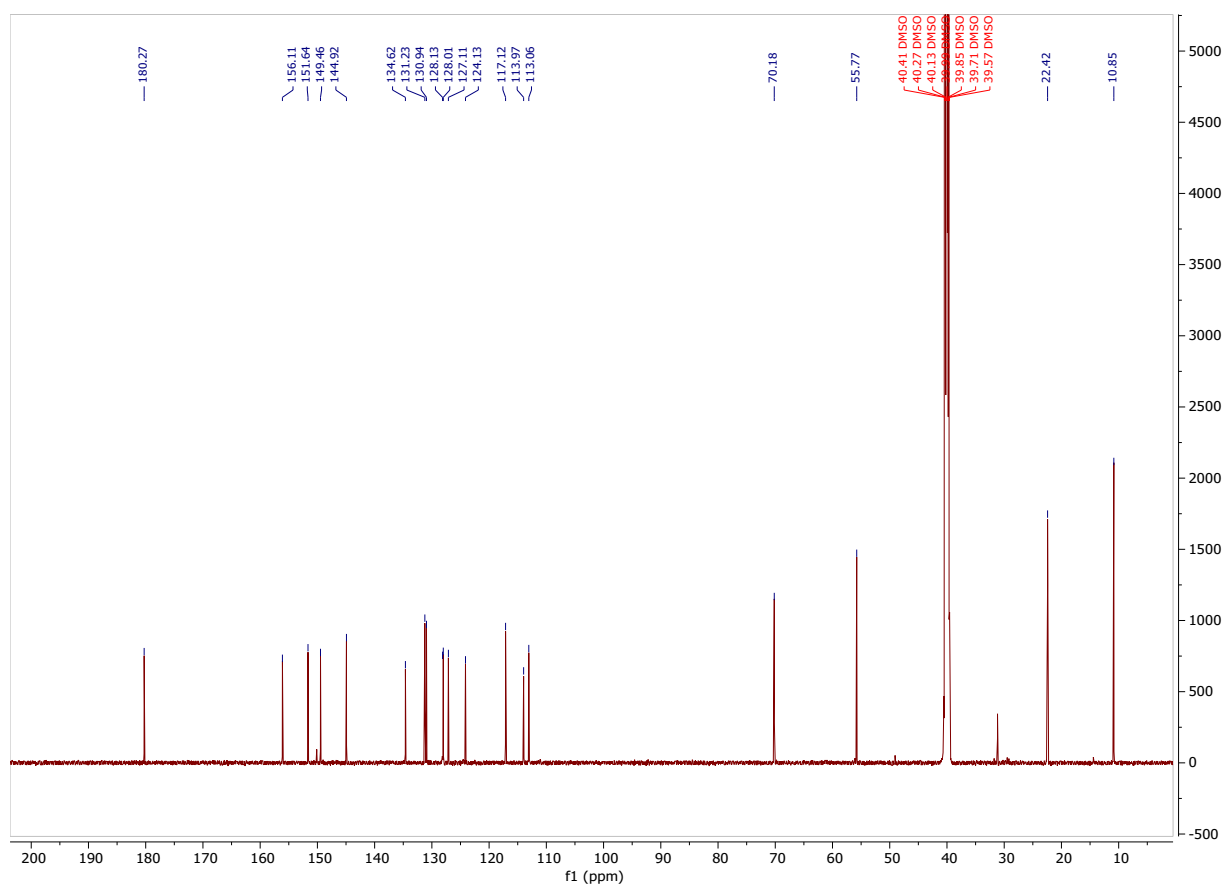

# <sup>1</sup>H-NMR (600 MHz, DMSO-d<sub>6</sub>) Spectrum of Compound 19

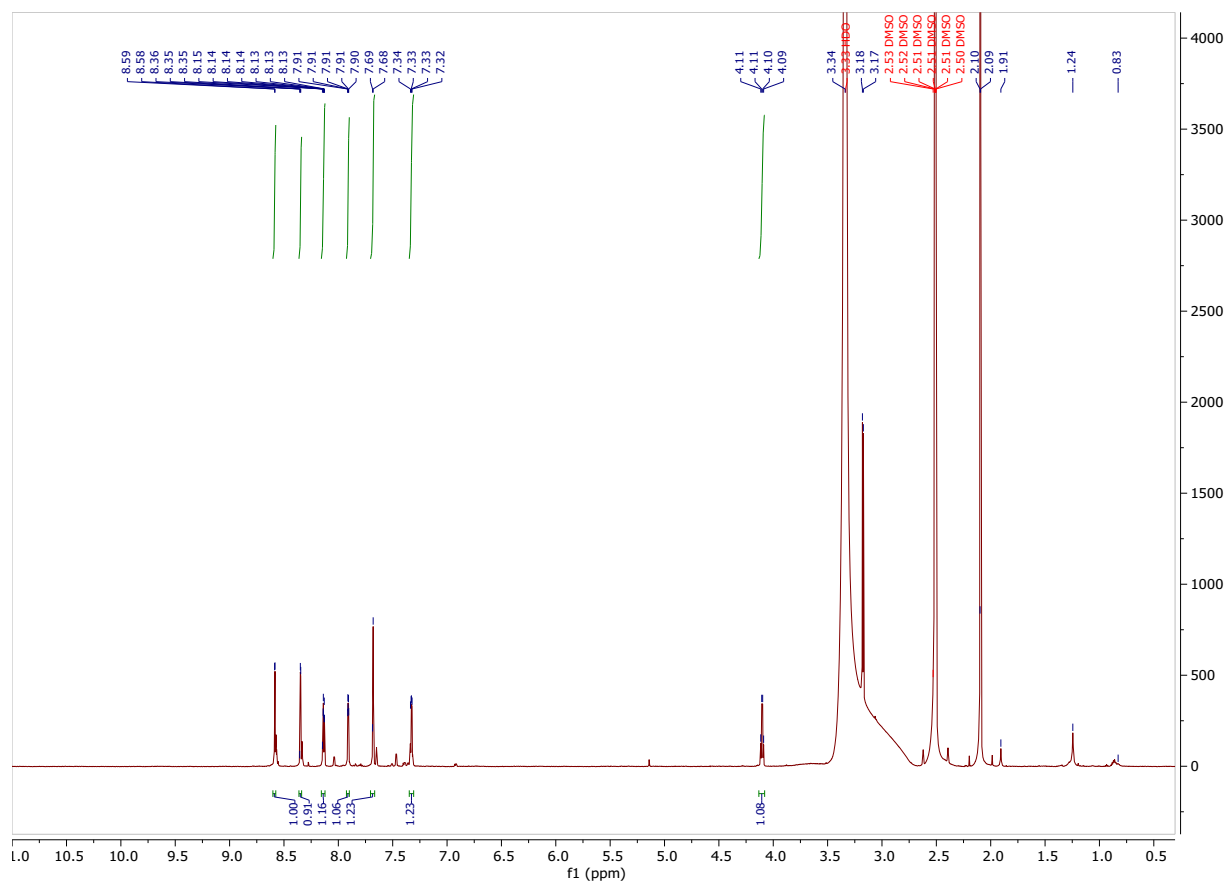

### $^{13}\text{C}$ -NMR (151 MHz, DMSO- $d_6$ ) Spectrum of Compound 19

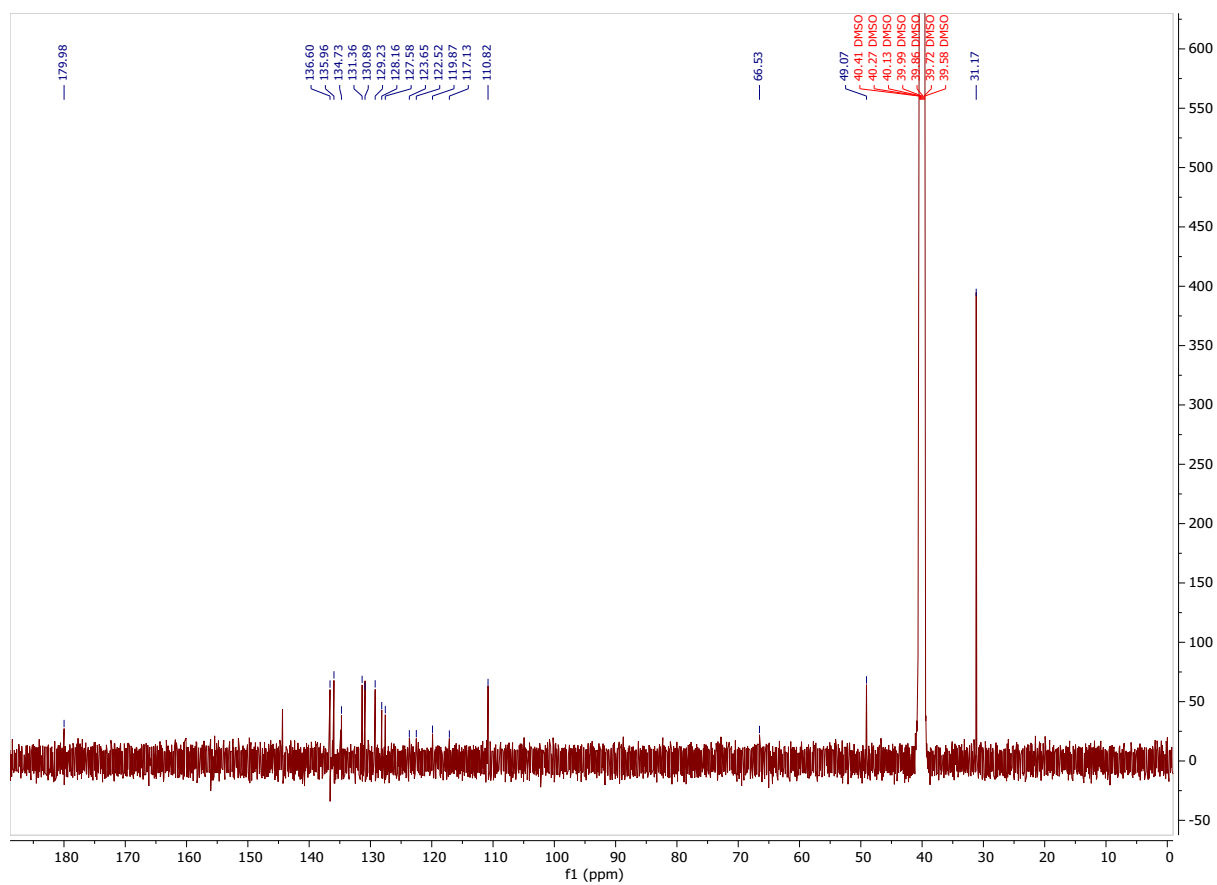

# <sup>1</sup>H-NMR (300 MHz, DMSO-d<sub>6</sub>) Spectrum of Compound 20

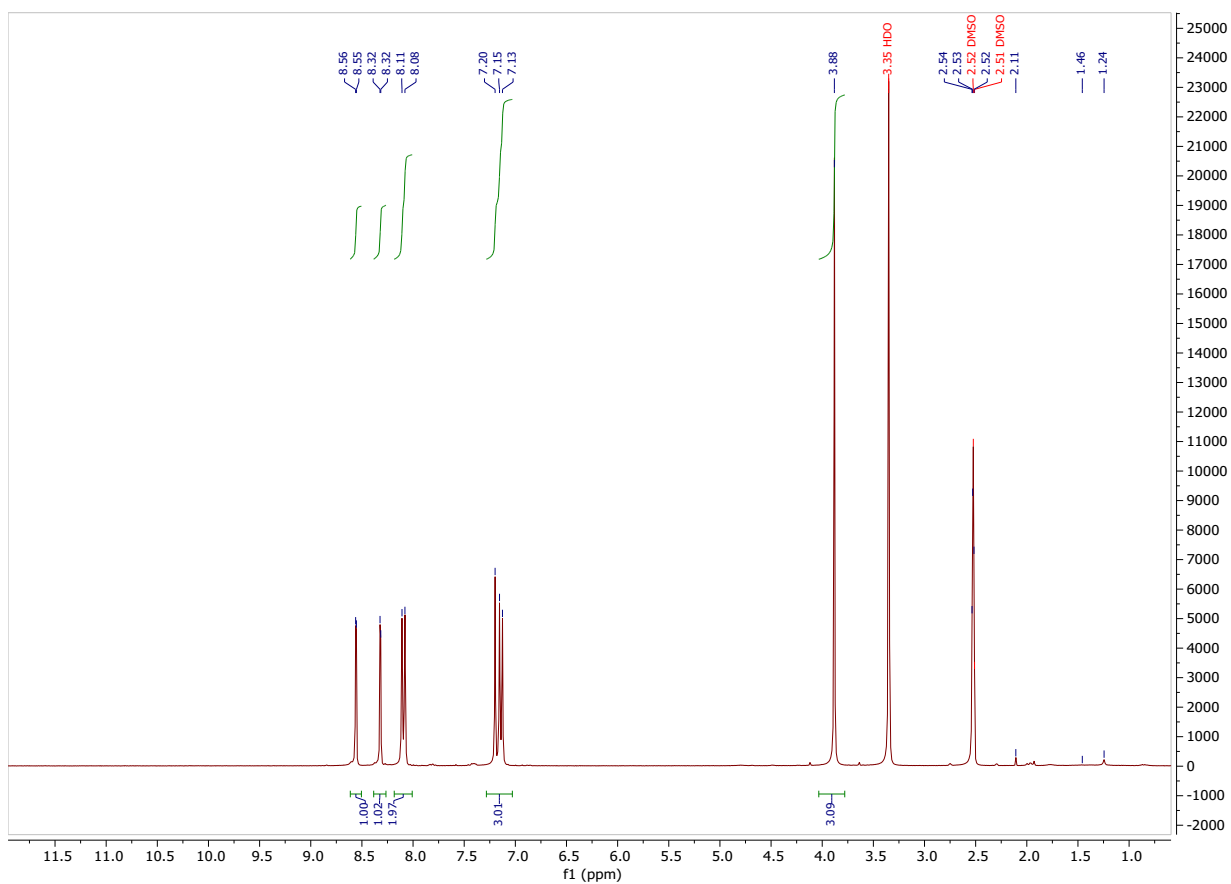

# $^{13}\text{C}$ -NMR (75 MHz, DMSO- $d_6$ ) Spectrum of Compound 20

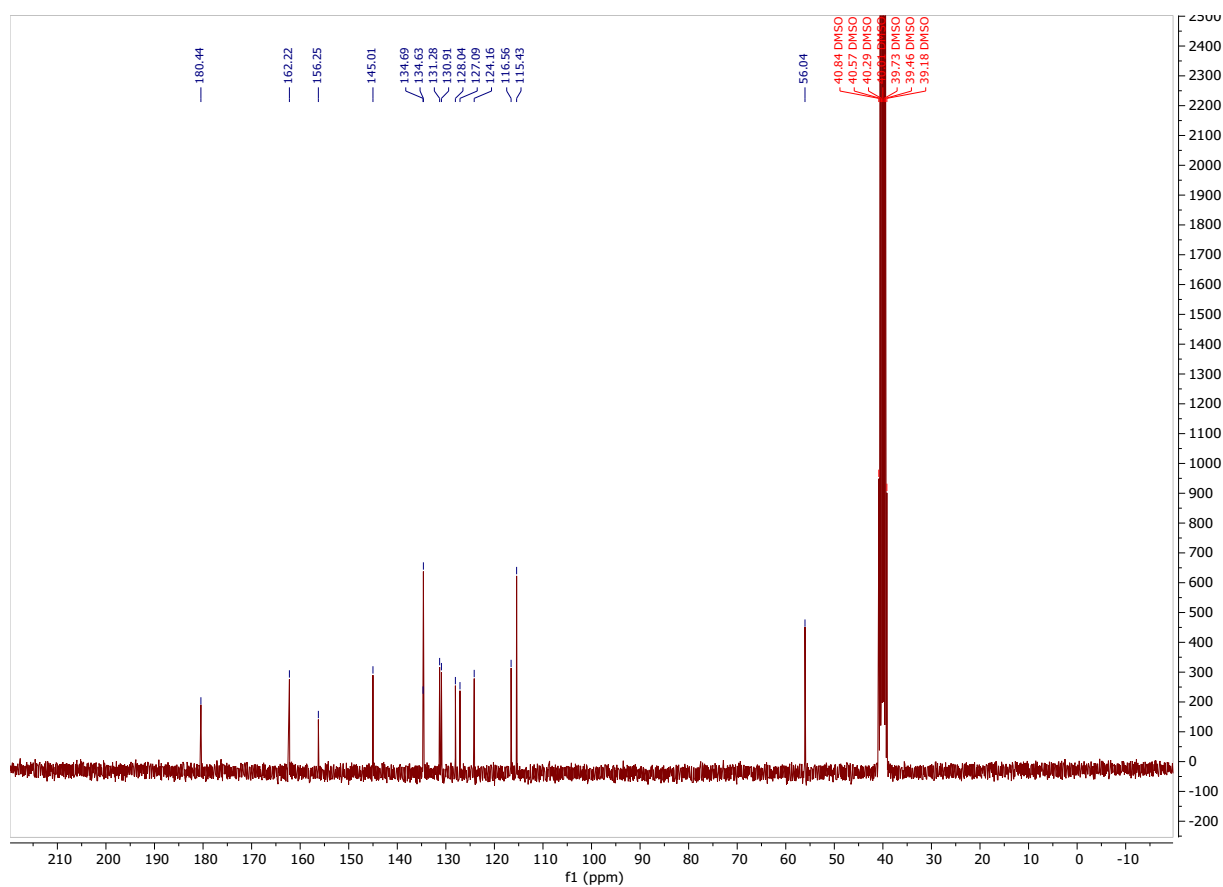

# <sup>1</sup>H-NMR (600 MHz, DMSO-d<sub>6</sub>) Spectrum of Compound 21

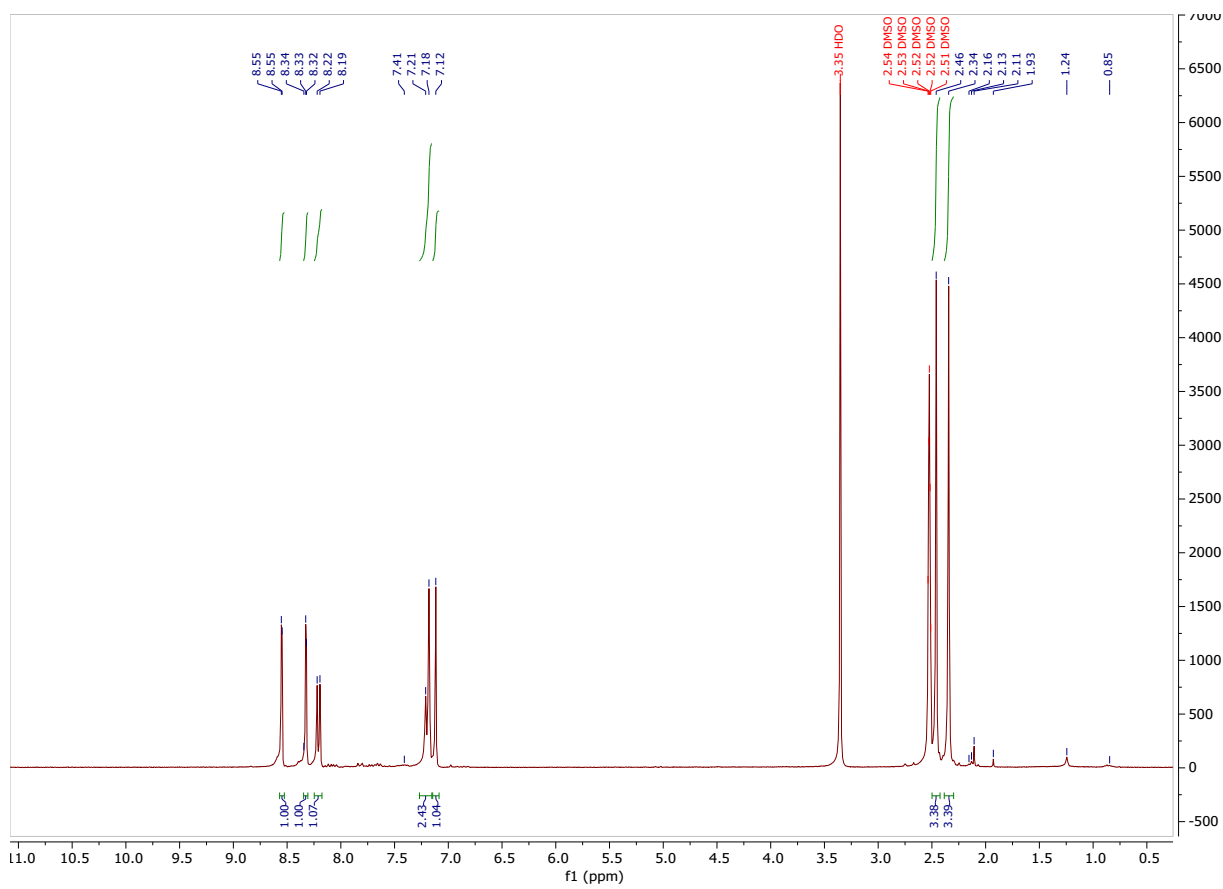

**$^{13}\text{C}$ -NMR (151 MHz, DMSO- $d_6$ ) Spectrum of Compound 21**



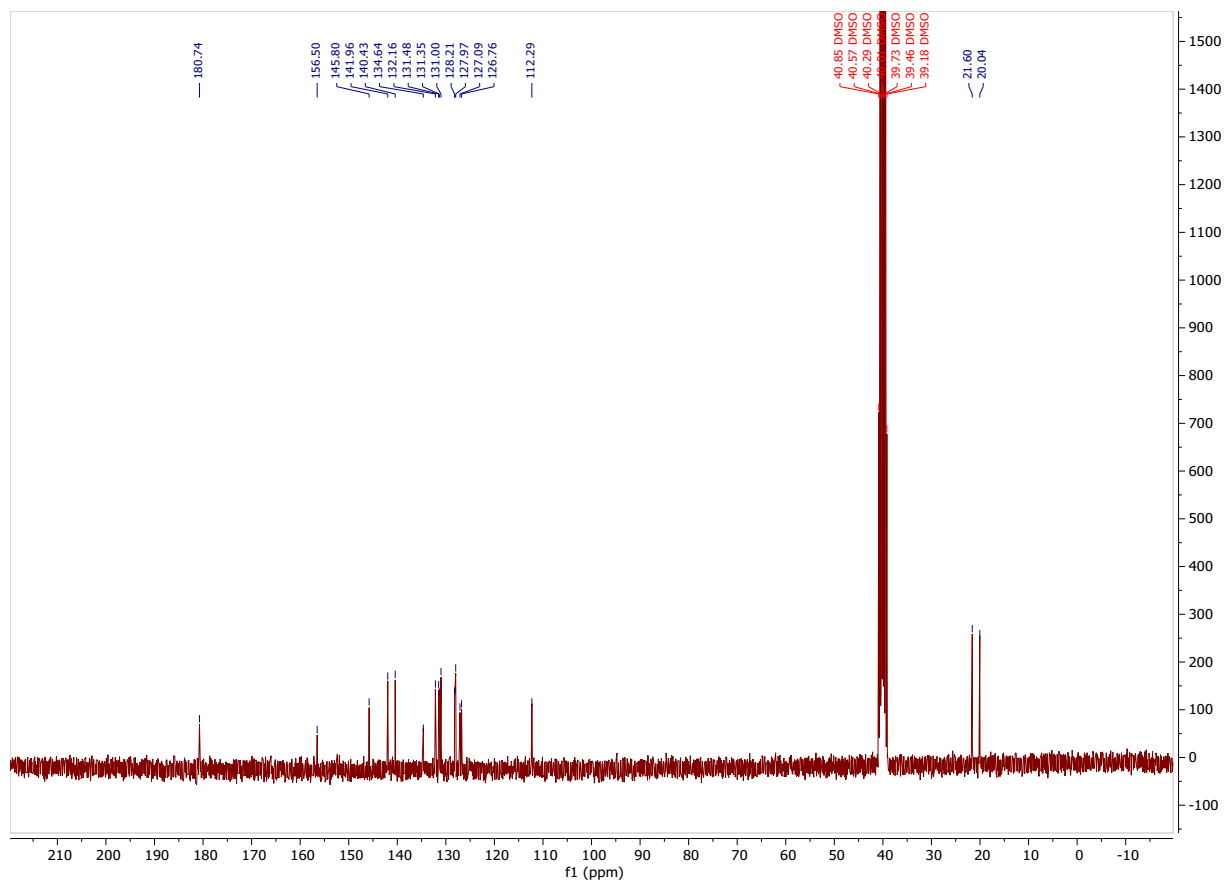

**$^1\text{H-NMR}$  (300 MHz,  $\text{DMSO-d}_6$ ) Spectrum of Compound 22**

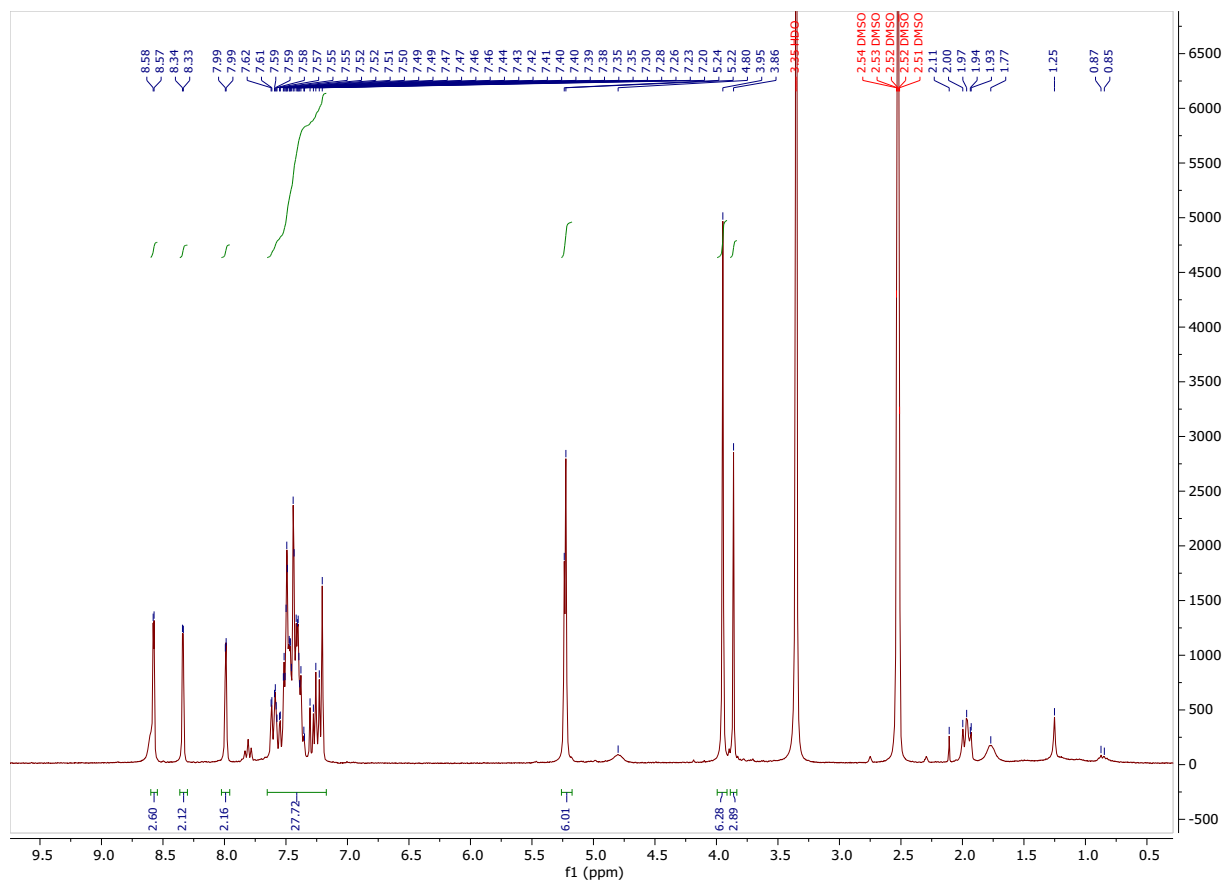

**<sup>13</sup>C-NMR (75 MHz, DMSO-d<sub>6</sub>) Spectrum of Compound 22**

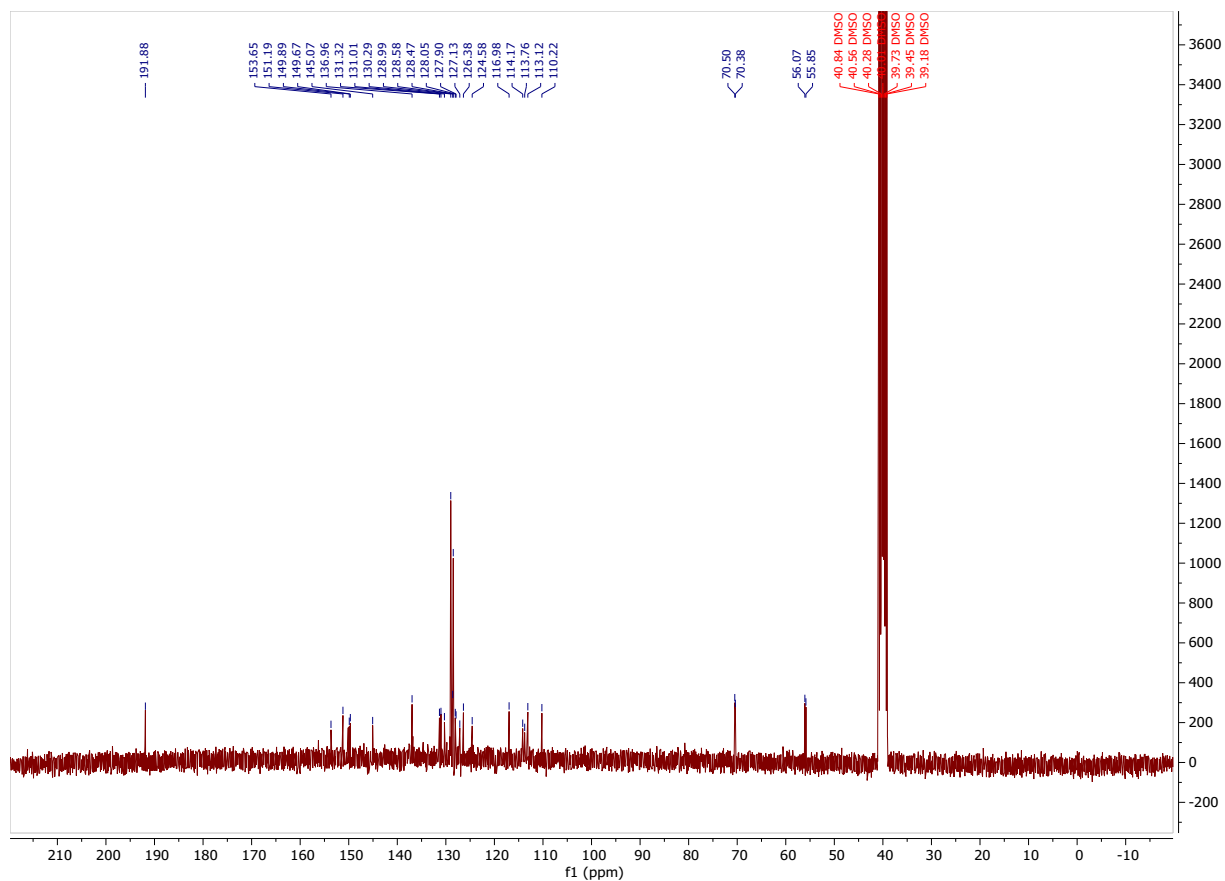

## Supplementary Information (SI-2) Docking Images

**2-Benzylidenebenzofuran-3(2H)-ones as a New Class of Alkaline Phosphatase Inhibitors: Synthesis, SAR Analysis, Enzyme Inhibitory Kinetics and Computational Studies**

**Jamshaid Ashraf<sup>a</sup>, Ehsan Ullah Mughal<sup>\*a</sup>, Reem I. Alsantali<sup>b</sup>, Amina Sadiq<sup>c</sup>, Rabab. S. Jassas<sup>d</sup>, Nafeesa Naeem<sup>a</sup>, Zaman Ashraf<sup>\*e</sup>, Yasir Nazir<sup>e,f</sup>, Muhammad Naveed Zafar<sup>g</sup>, Amara Mumtaz<sup>h</sup>, Masoud Mirzaei<sup>i</sup>, Satar Saberi<sup>j</sup>, Saleh A. Ahmed<sup>\*k,l</sup>**

*<sup>a</sup>Department of Chemistry, University of Gujrat, Gujrat-50700, Pakistan*

*<sup>b</sup>Department of Pharmaceutical Chemistry, College of Pharmacy, Taif University, P.O.Box 11099, Taif 21944, Saudi Arabia*

*<sup>c</sup>Department of Chemistry, Govt. College Women University, Sialkot-51300, Pakistan*

*<sup>d</sup>Department of Chemistry, Jamoum University College, Umm Al-Qura University, 21955 Makkah, Saudi Arabia*

*<sup>e</sup>Department of Chemistry, Allama Iqbal Open University, Islamabad-44000 Pakistan*

*<sup>f</sup>Department of Chemistry, University of Sialkot, Sialkot-51300, Pakistan*

*<sup>g</sup>Department of Chemistry, Quaid-i-Azam University, Islamabad-45320, Pakistan*

*<sup>h</sup>Department of Chemistry, COMSATS University Islamabad, Abbottabad, Pakistan*

*<sup>i</sup>Department of Chemistry, Faculty of Science, Ferdowsi University of Mashhad, Mashhad, 9177948974, Iran*

*<sup>j</sup>Department of Chemistry, Faculty of Science, Farhangian University, Tehran, Iran*

*<sup>k</sup>Department of Chemistry, Faculty of Applied Science, Umm Al-Qura University, 21955 Makkah Saudi Arabia*

*<sup>l</sup>Chemistry Department, Faculty of Science, Assiut University, 71516 Assiut, Egypt*

## **Representative Docking Images of All the Synthesized Compounds**

### **Compound-1**

---

\* Correspondence may be addressed to: Ehsan Ullah Mughal; E-mail address: [ehsan.ullah@uog.edu.pk](mailto:ehsan.ullah@uog.edu.pk), Zaman Ashraf; E-mail address: [mzchem@yahoo.com](mailto:mzchem@yahoo.com), Saleh A. Ahmed; Email address: [saahmed@uqu.edu.sa](mailto:saahmed@uqu.edu.sa)

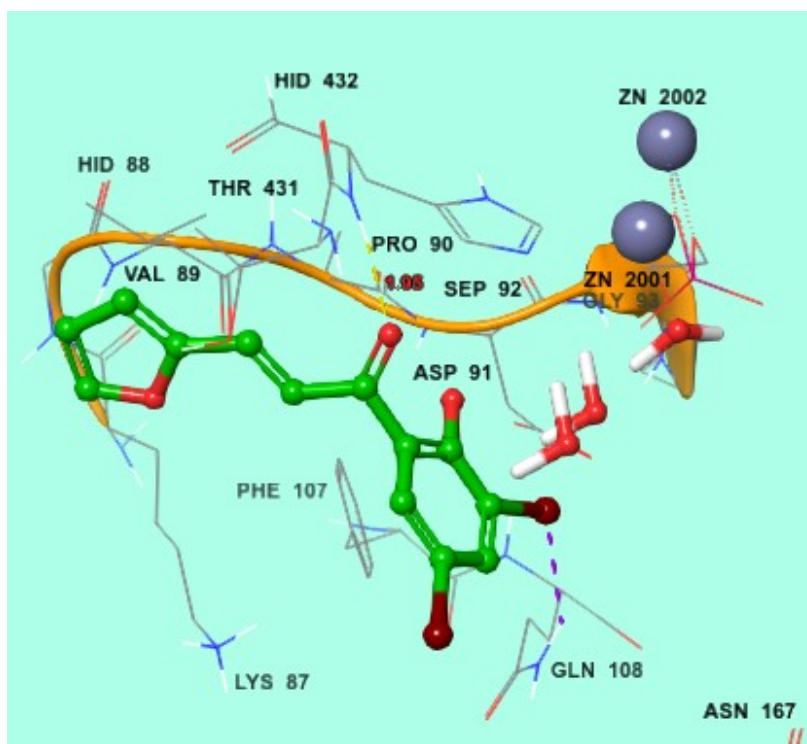

**Compound-2**

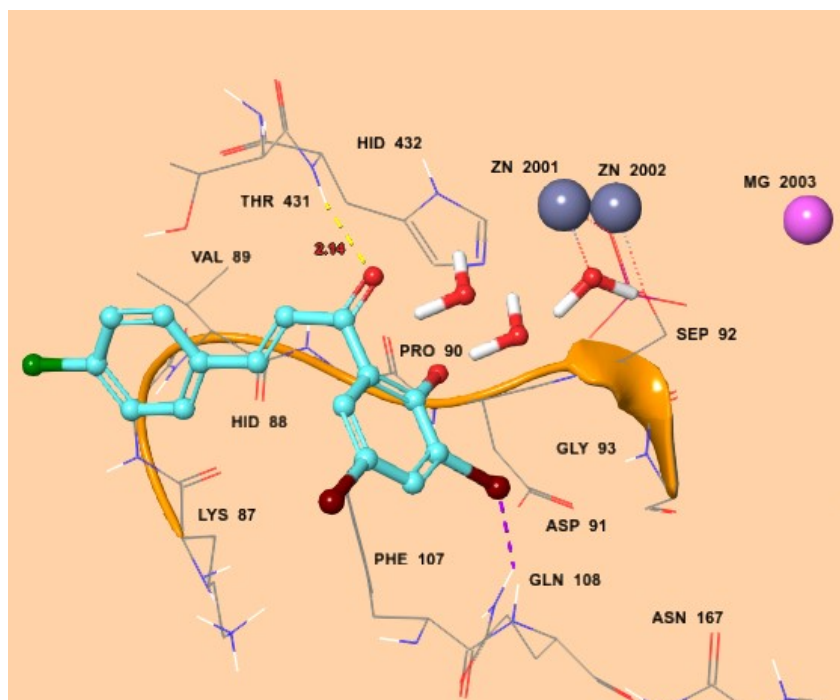

**Compound-3**

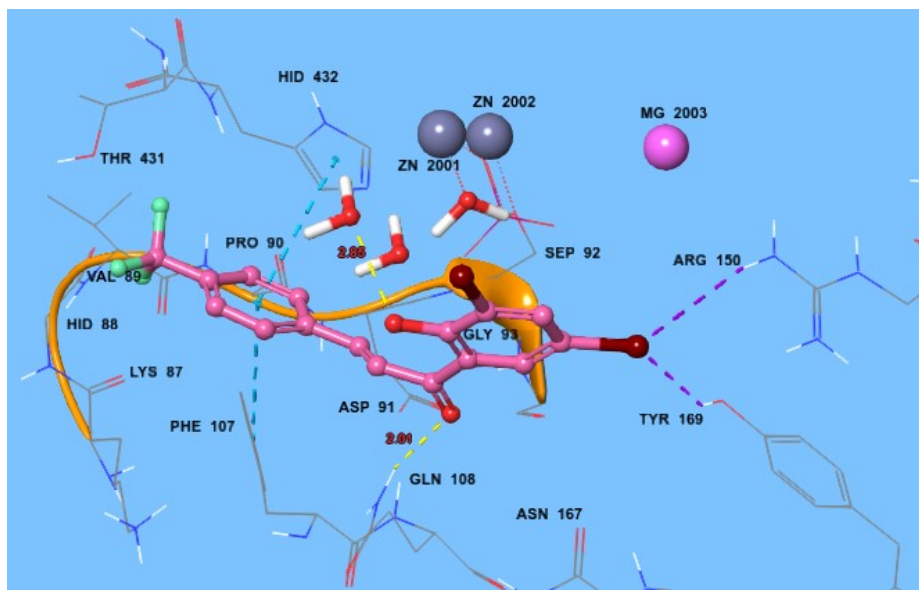

**Compound-4**

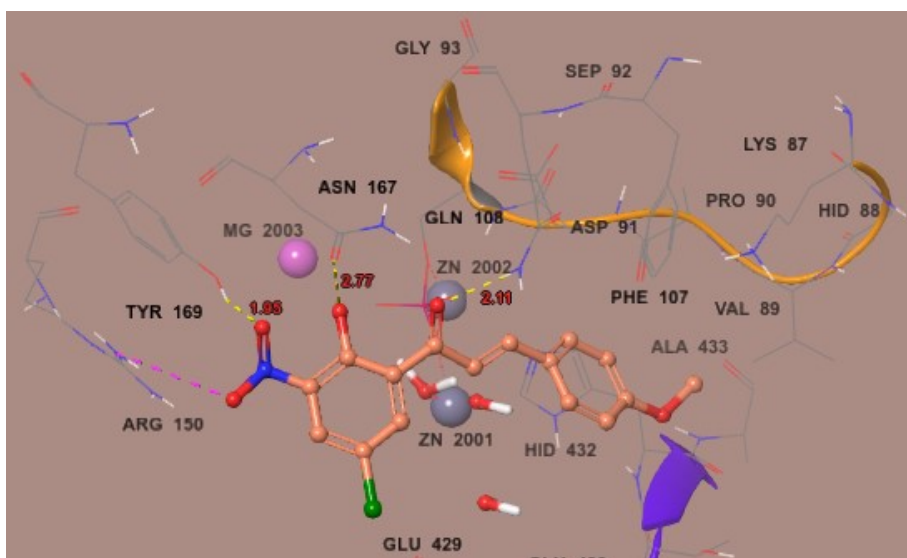

**Compound-5**

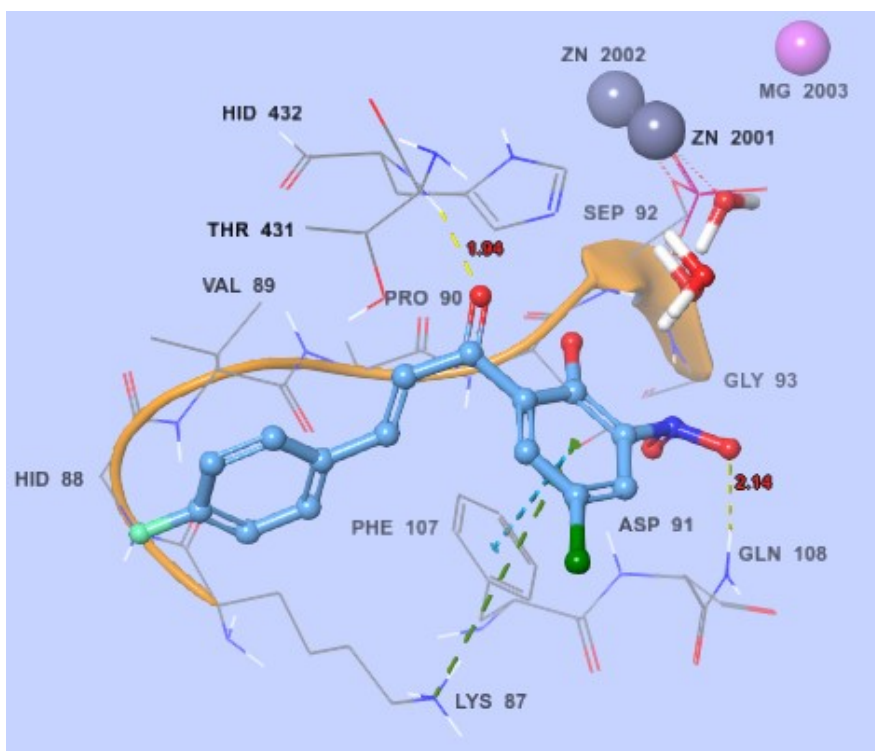

**Compound-6**

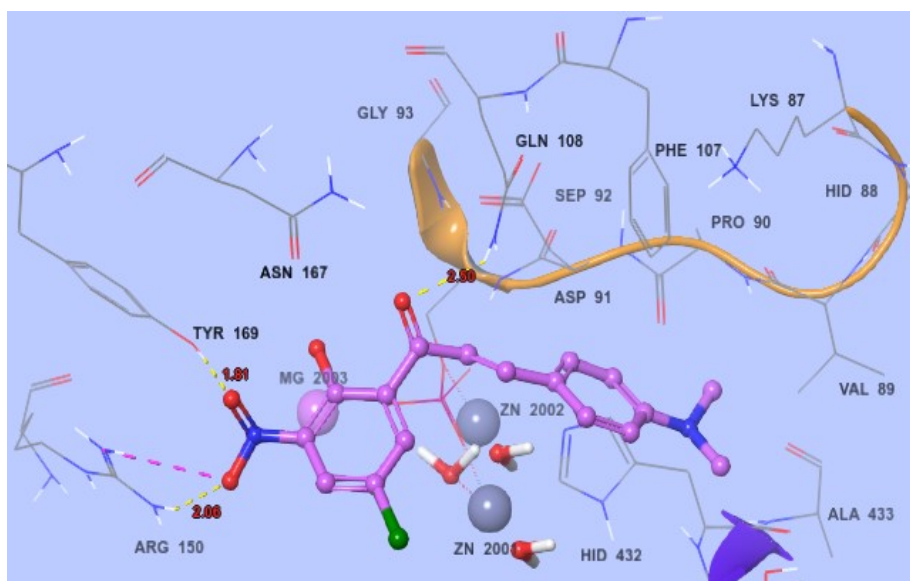

**Compound-7**

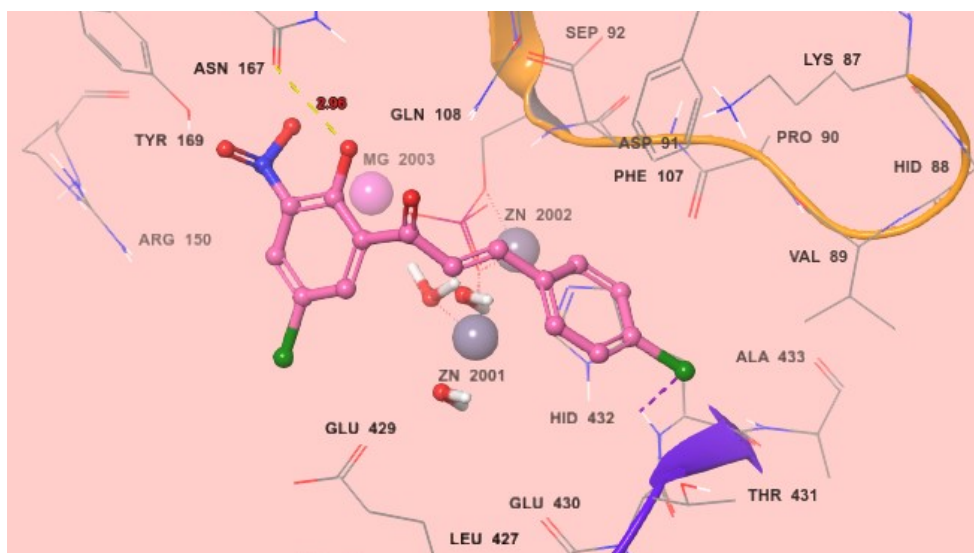

**Compound-8**

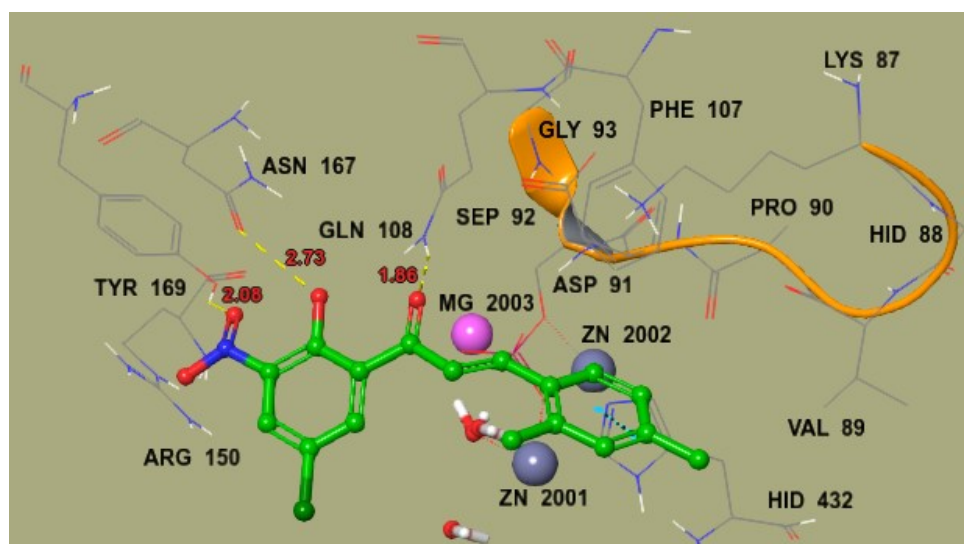

**Compound-9**



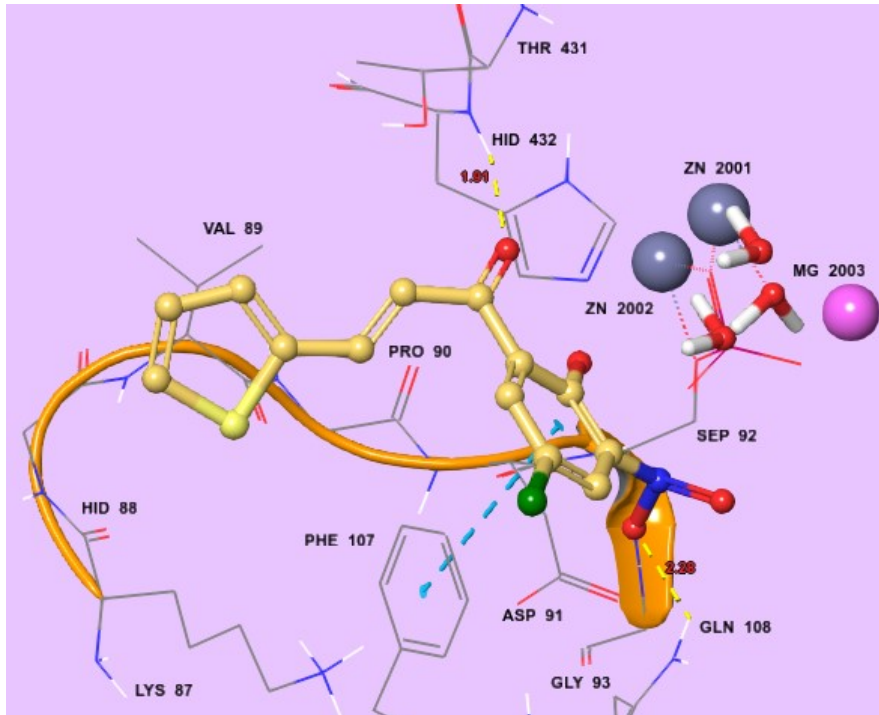

**Compound-10**

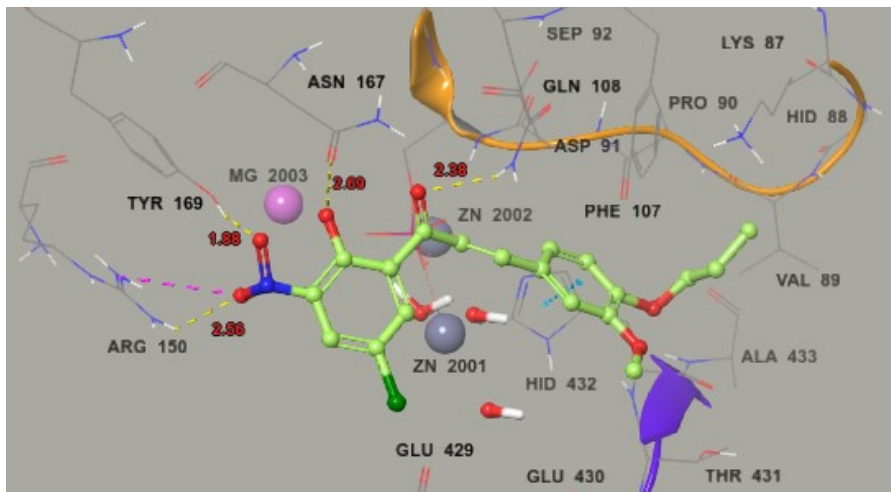

**Compound-11**

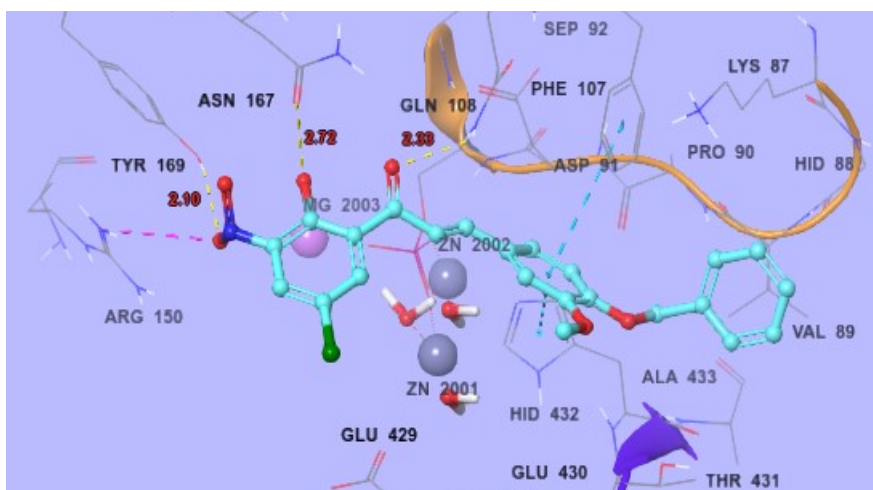

**Compound-12**

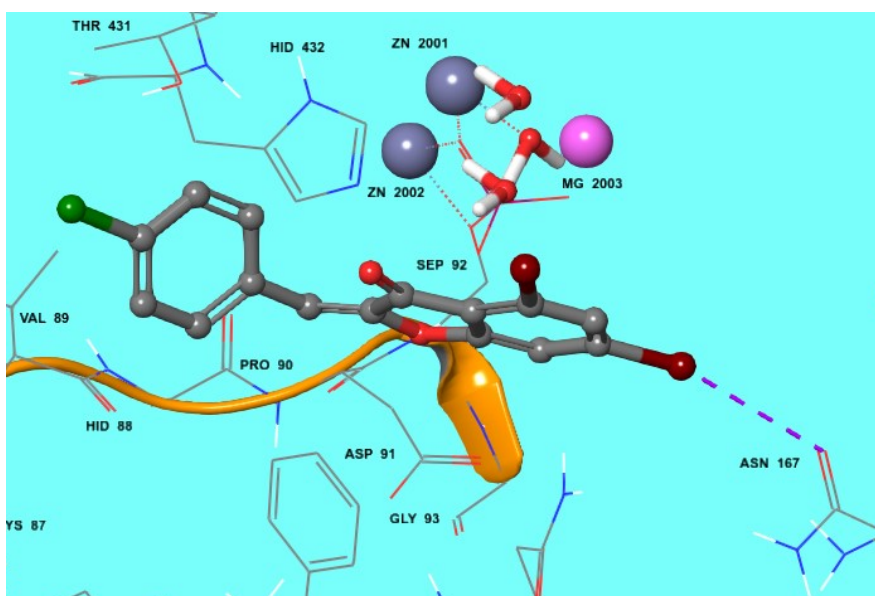

**Compound-13**

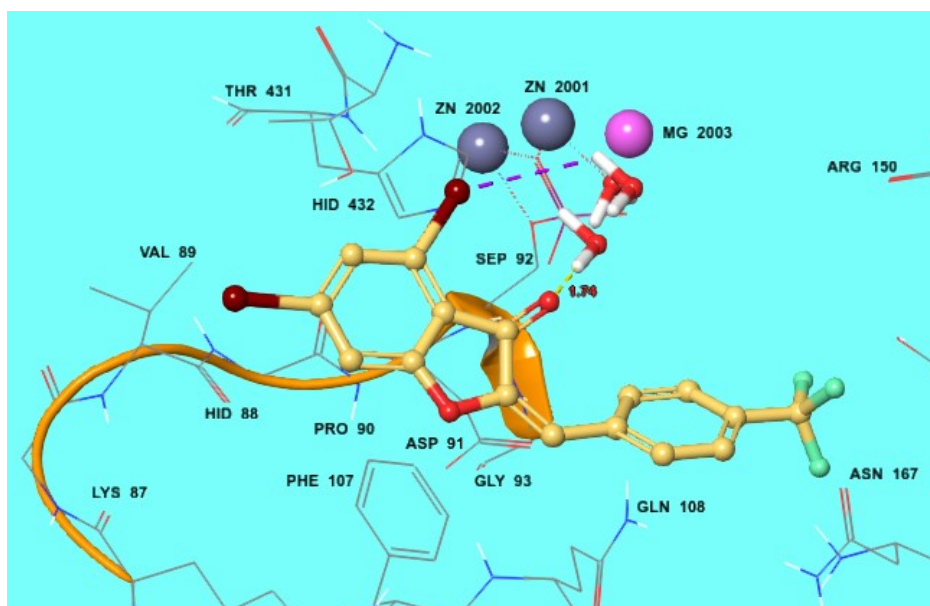

**Compound-14**

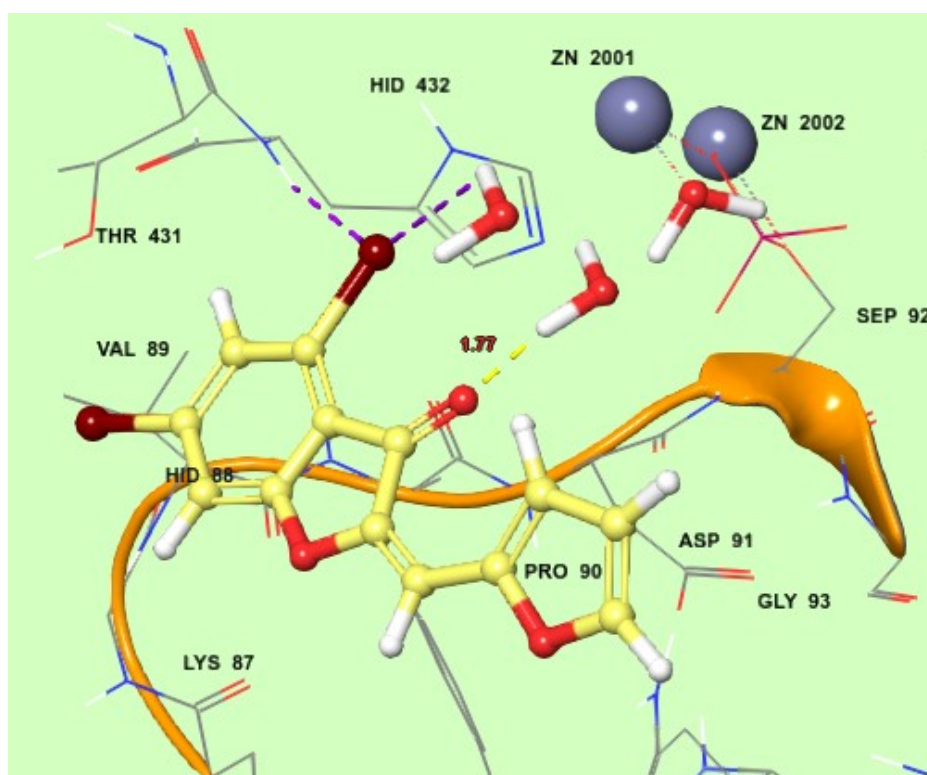

**Compound-15**

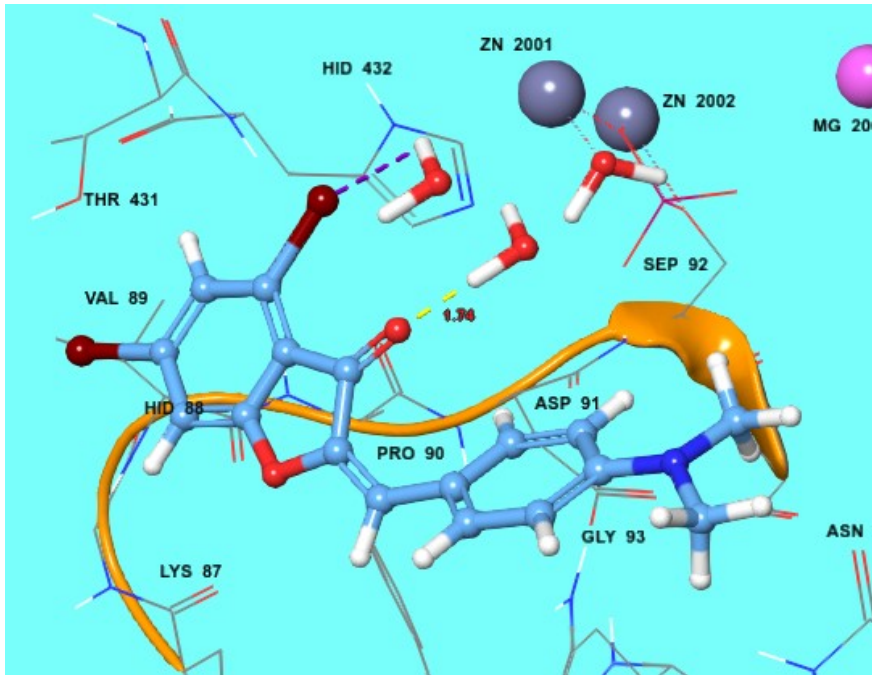

**Compound-16**

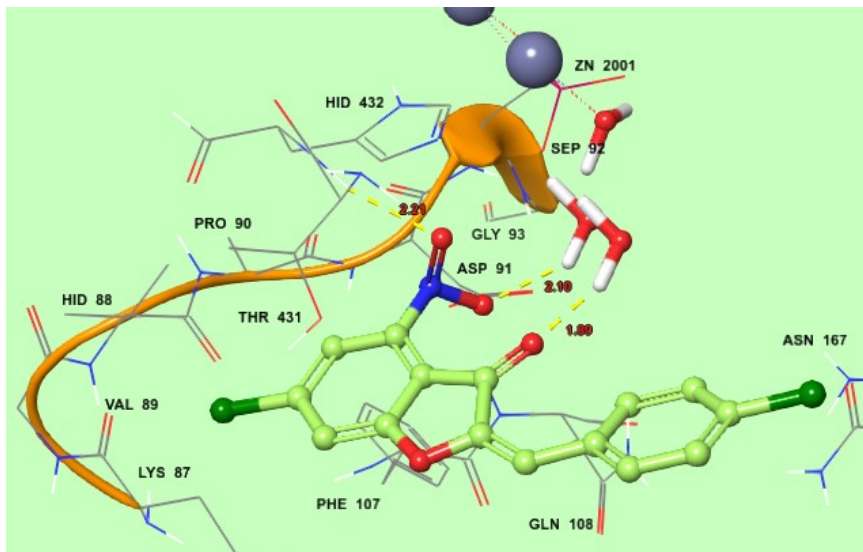

**Compound-17**

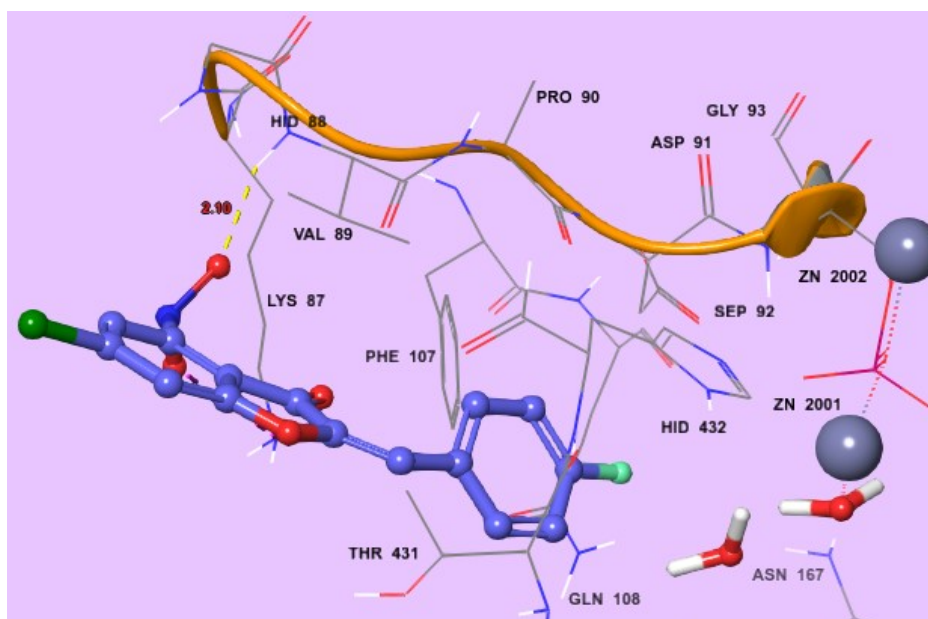

**Compound-18**

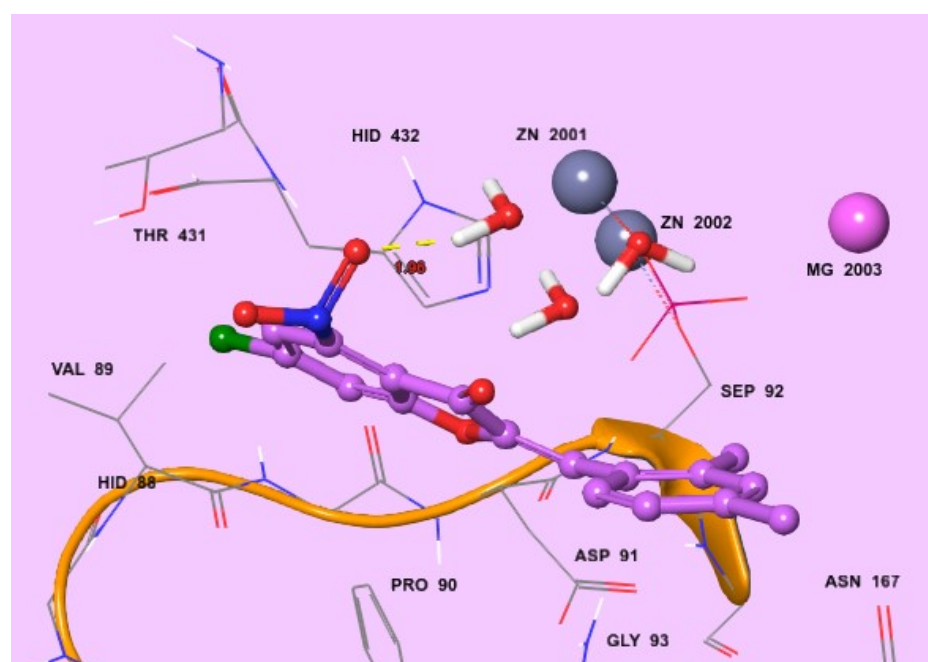

**Compound-19**

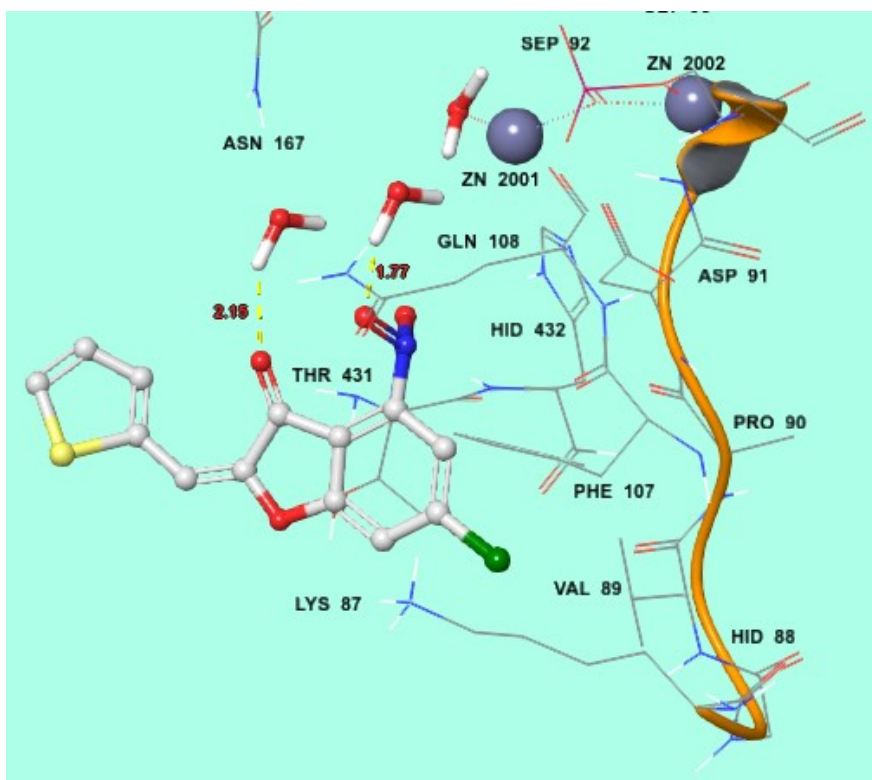

**Compound-20**

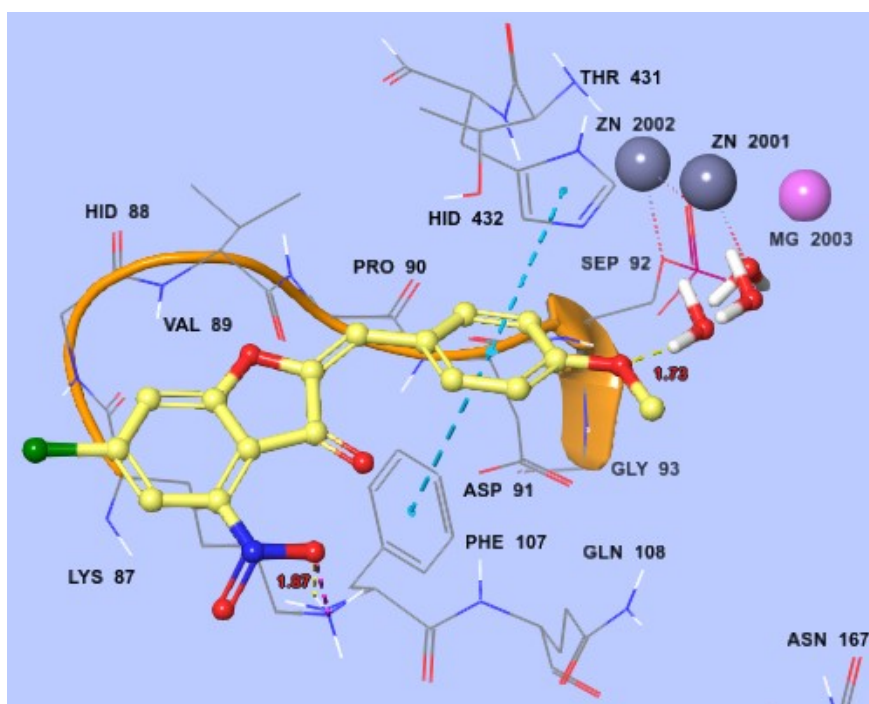

**Compound-21**

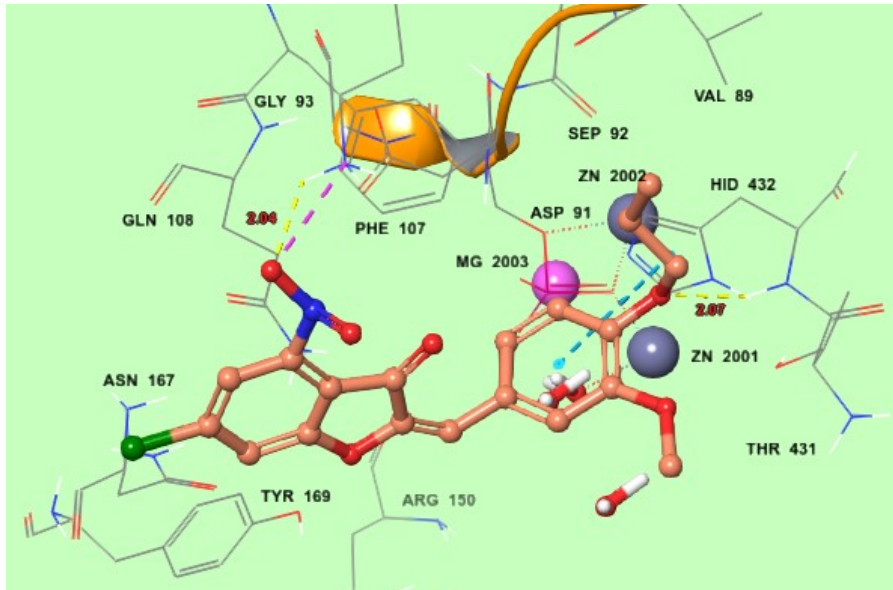

**Compound-22**

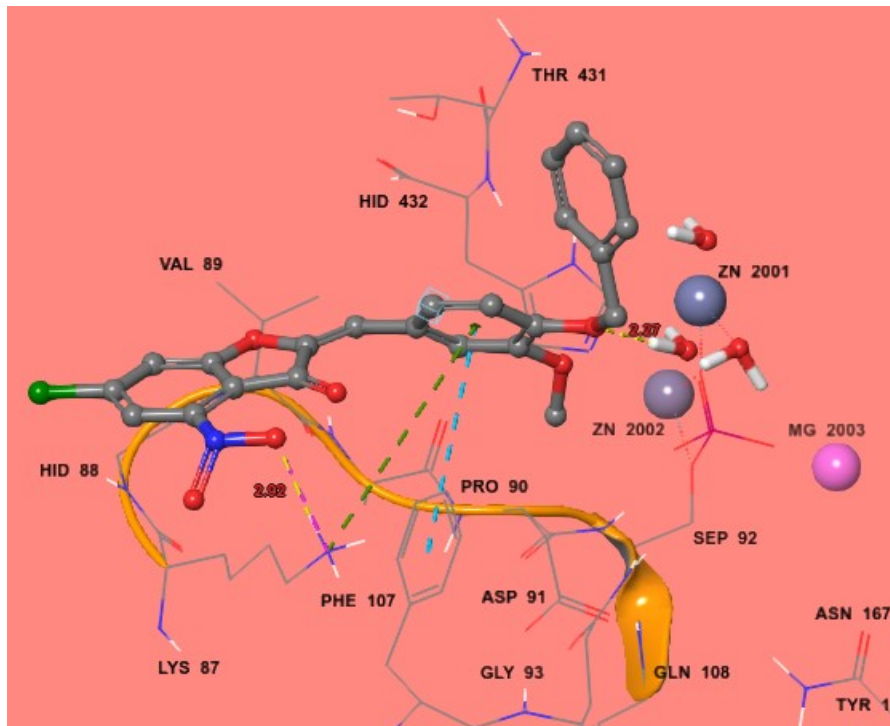

Supplement: d1ra07379f1.pdf [file d1ra07379f1.pdf]
